# Supplementary material
Source: PubMed Central journal article supplement (PMC7975689)
Supplement: NIHMS1676492-supplement-Marraffini-Meeske_Science_July2020_Suppl_S1-S12__TableS1-S7.pdf [file NIHMS1676492-supplement-Marraffini-Meeske_Science_July2020_Suppl_S1-S12__TableS1-S7.pdf]

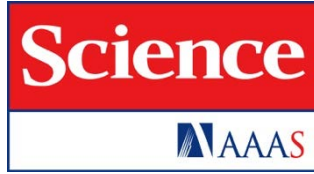

## Supplementary Materials for

A phage-encoded anti-CRISPR enables complete evasion of type VI-A  
CRISPR-Cas immunity

Alexander J. Meeske, Ning Jia, Alice K. Cassel, Albina Kozlova, Jingqiu Liao, Martin  
Wiedmann, Dinshaw J. Patel, Luciano A. Marraffini

correspondence to: [marraffini@rockefeller.edu](mailto:marraffini@rockefeller.edu), [pateld@mskcc.org](mailto:pateld@mskcc.org)

**This PDF file includes:**

Materials and Methods  
SupplementaryText  
Figs. S1 to S12  
Tables S1 to S7

## Materials and Methods

### Bacterial strains and growth conditions

All genetically modified *L. seeligeri* strains generated in this study are derived from *L. seeligeri* SLCC3954 (19). Environmental *L. seeligeri* isolates and *L. monocytogenes* strains are listed in Table S2. Unless otherwise stated, *L. seeligeri* and *L. monocytogenes* strains were cultured in Brain Heart Infusion (BHI) medium at 30°C. Where appropriate, BHI was supplemented with the following antibiotics for selection: nalidixic acid (50 µg/mL) chloramphenicol (10 µg/mL), erythromycin (1 µg/mL), or kanamycin (50 µg/mL). For cloning, plasmid preparation, and conjugative plasmid transfer, *E. coli* strains were cultured in Lysogeny Broth (LB) medium at 37°C. Where appropriate, LB was supplemented with the following antibiotics: ampicillin (100 µg/mL), chloramphenicol (25 µg/mL), kanamycin (50 µg/mL). For conjugative transfer of *E. coli* – *Listeria* shuttle vectors, plasmids were purified from Turbo Competent *E. coli* (New England Biolabs) and transformed into the *E. coli* conjugative donor strains SM10  $\lambda$ pir or S17  $\lambda$ pir (30).

### Phage isolation and propagation

Temperate listeriophages were isolated by prophage induction via stimulation of the SOS response with the DNA-damaging agent mitomycin C, followed by plaque isolation on the *L. seeligeri*  $\Delta$ RM  $\Delta$ spc indicator strain. Each strain of *L. seeligeri* and *L. monocytogenes* was cultured overnight and diluted to OD<sub>600</sub> = 0.1, then treated with 1 µg/mL mitomycin C to activate the phage lytic cycle. Prophage induction was carried out overnight at 30°C, then culture supernatants were passed through 0.45 µm filters. Each filtrate was screened for phages by infection of  $\Delta$ RM  $\Delta$ spc using the top agar overlay method: 100ul of serially diluted induction filtrate was used to infect 100 µL of saturated  $\Delta$ RM  $\Delta$ spc culture in a 5 mL overlay of BHI containing 0.75% agar, in the presence of 5 mM CaCl<sub>2</sub>. Infection plates were incubated at 30° for 24 hrs. Single plaques were resuspended in BHI, then propagated three times on  $\Delta$ RM  $\Delta$ spc, a single plaque was isolated each time to ensure phage purity. High titer phage lysates were obtained by preparing top agar infections of  $\Delta$ RM  $\Delta$ spc with plaques at near-confluent density, then soaking the agar with SM buffer (100mM NaCl, 10mM MgSO<sub>4</sub>, 50mM Tris-HCl pH 7.5).

### Plasmid construction and preparation

All genetic constructs for expression in *L. seeligeri* were cloned into the following three compatible shuttle vectors, each of which contains an origin of transfer sequence for mobilization by transfer genes of the IncP-type plasmid RP4. These transfer genes are integrated into the genome of the *E. coli* conjugative donor strains SM10  $\lambda$ pir and S-17  $\lambda$ pir (30). All plasmids used in this study, along with details of their construction, can be found in Table S2.

pPL2e – single-copy plasmid conferring erythromycin resistance that integrates into the *tRNA<sup>Arg</sup>* locus in the *L. seeligeri* chromosome (31).

pAM8 – *E. coli* – *Listeria* shuttle vector conferring chloramphenicol resistance (32).

pAM326 - *E. coli* – *Listeria* shuttle vector conferring kanamycin resistance (constructed in this study).

To express crRNAs containing engineered spacers, a minimal type VI CRISPR array containing the native promoter and a single repeat-spacer-repeat unit with BsaI entry sites was cloned into BamHI/SalI-digested pPL2e to generate pAM305. To clone new spacers, pAM305 was digested with BsaI, and ligated to spacer inserts consisting of annealed oligos with cohesive overhangs compatible with the sticky ends generated by BsaI-cleavage of pAM305.

All plasmid targeting assays described in this study use the pAM8-derived plasmid pAM54 (32), in which a protospacer matching the endogenous type VI *spc4* was cloned into the 3' untranslated region of a chloramphenicol resistance cassette. The negative control for plasmid targeting assays is pAM8, which contains the chloramphenicol cassette without a protospacer.

Putative anti-CRISPR constructs were assembled by cloning into HindIII/EagI-digested pAM326.

#### *E. coli* – *L. seeligeri* conjugation

All genetic constructs for expression in *L. seeligeri* were introduced by conjugation with the *E. coli* donor strains SM10  $\lambda$ pir, S-17  $\lambda$ pir (30), or for allelic exchange (see below),  $\beta$ 2163  $\Delta$ dapA (33). Donor cultures were grown overnight in LB medium supplemented with the appropriate antibiotic (25  $\mu$ g/mL chloramphenicol for pPL2e-derived plasmids, 100  $\mu$ g/mL ampicillin for pAM8-derived plasmids, or 50  $\mu$ g/mL kanamycin for pAM326-derived plasmids) at 37°C. Recipient cultures were grown overnight in BHI medium supplemented with the appropriate antibiotic (1  $\mu$ g/mL erythromycin for pPL2e-derived plasmids, 10  $\mu$ g/mL chloramphenicol for pAM8-derived plasmids, 50  $\mu$ g/mL kanamycin for pAM326-derived plasmids) at 30°C. 100  $\mu$ L each of donor and recipient culture were diluted into 10 mL of BHI medium, and concentrated onto a filter disc (Millipore-Sigma, HAWP04700) using vacuum filtration. Filter discs were laid onto BHI agar supplemented with 8  $\mu$ g/mL oxacillin (which weakens the cell wall and enhances conjugation) and incubated at 37°C for 4 hr. Discs were removed, cells were resuspended in 2 mL BHI, and transconjugants were selected on medium containing 50  $\mu$ g/mL nalidixic acid (which kills donor *E. coli* but not recipient *L. seeligeri*) in addition to the appropriate antibiotic for plasmid selection. Transconjugants were isolated after 2-3 days incubation at 30°C.

#### Gene deletions in *L. seeligeri*

Allelic exchange plasmids were generated by cloning 1kb homology arms flanking the genomic region to be deleted into the suicide vector pAM215 (11), which does not replicate in *Listeria*, and contains a chloramphenicol resistance cassette and *lacZ* from *Geobacillus stearothermophilus*. These plasmids were then transformed into the *E. coli* donor strain  $\beta$ 2163  $\Delta$ dapA(33), which is auxotrophic for diaminopimelic acid (DAP), selecting on LB medium supplemented with the appropriate antibiotic and 1.2 mM DAP. Conjugation was carried out as described above, except all steps were carried out in the presence of 1.2 mM DAP. Transconjugants were selected on media lacking DAP and containing 50  $\mu$ g/mL nalidixic acid, to ensure complete killing of donor *E. coli*, as well as 10  $\mu$ g/mL chloramphenicol to select for integration of the pAM215-derived plasmid. Chloramphenicol-resistant colonies were patched on BHI supplemented with 100  $\mu$ g/mL 5-Bromo-4-Chloro-3-Indolyl  $\beta$ -D-Galactopyranoside (X-gal) and confirmed *lacZ*<sup>+</sup> by

checking for blue colony color. Plasmid integrants were passaged 3-4 times in BHI at 30° in the absence of antibiotic selection, to permit loss of the integrated plasmid. Cultures were screened for plasmid excision by dilution and plating on BHI + X-gal. White colonies were checked for chloramphenicol sensitivity, then chromosomal DNA was prepared from each, and tested for the desired deletion by PCR using primers flanking the deletion site. Deletions were finally confirmed by Sanger sequencing.

#### Bacterial genome sequencing, genome assembly, and $\phi$ LS46 identification

The  $\phi$ LS46 genome was sequenced by whole-genome sequencing and assembly of its parent lysogen, *L. seeligeri* LS46. Chromosomal DNA was prepared from LS46 by lysozyme digestion of the cell wall, followed by cell lysis with 1% sarkosyl, then phenol-chloroform extraction and ethanol precipitation. 1 ng of chromosomal DNA was used to make an NGS library using the Illumina Nextera XT DNA Library Preparation Kit according to the manufacturer's instructions. Library quality was confirmed by analysis on Agilent TapeStation, then 2x150bp paired-end sequencing was carried out on the Illumina NextSeq platform. Raw reads were quality-trimmed using Sickle (<https://github.com/najoshi/sickle>) using a quality cutoff of 30 and length cutoff of 45. Trimmed reads were assembled using SPAdes (<http://cab.spbu.ru/software/spades/>) with the default parameters, which resulted in 140 assembled contigs with an N50 of 2841899. These contigs were mapped onto the completed reference genome of *L. seeligeri* SLCC3954 using Medusa (<http://combo.dbe.unifi.it/medusa/>) with the default parameters, which resulted in 105 scaffold assemblies. In our draft genome assembly, one scaffold (Scaffold 1) represents a 2.8 Mbp assembly, Scaffold 7 contains 46 Kbp, and each of the remaining 103 scaffolds contains between 100-1300 bp. To identify putative prophages in the assembled genome, we used Phaster (<http://phaster.ca>), which predicted a single prophage element, occupying the entirety of Scaffold 7. We confirmed that this prophage ( $\phi$ LS46) was the one isolated by mitomycin C induction of LS46 using PCR of the  $\Delta$ RM  $\Delta$ spc-passaged phage stock with  $\phi$ LS46-specific primers.

#### Construction of gene deletions in $\phi$ LS46

Gene deletions in  $\phi$ LS46 were constructed in two ways. One group of deletions was obtained by selection of spontaneous escapers of Cas9 targeting of the anti-CRISPR locus in  $\phi$ LS46. A Cas9 spacer targeting the anti-CRISPR region (*gp4*) was cloned into the vector pAM307, which carries Cas9 from *Streptococcus pyogenes* along with a repeat-spacer-repeat construct with BsaI entry sites. This plasmid (pAM379) was introduced into  $\Delta$ RM  $\Delta$ spc, which was then infected with ten-fold serial dilutions of  $\phi$ LS46 in a plaque assay on BHI top agar. Cas9-targeting reduced the efficiency of  $\phi$ LS46 plaquing by several orders of magnitude, but spontaneous Cas9-resistant escaper plaques were isolated and checked for deletions by PCR using primers flanking the anti-CRISPR locus. The deletions were then precisely mapped by Sanger sequencing. To generate an in-frame deletion of the *acrVIA1* gene, we first assembled a homology repair template (pAM386) containing 1kb homology arms flanking an in-frame deletion of *acrVIA1*. In the deletion construct, the first six and last six codons of *acrVIA1* remain, both to avoid Rho-dependent termination of untranslated RNA, as well as to preserve the Shine-Dalgarno sequence for the *gp3* gene predicted to be present in the last six codons of *acrVIA1*. The repair template plasmid was introduced into  $\Delta$ RM  $\Delta$ spc, this strain was

infected with  $\phi$ LS46 in BHI top agar (allowing recombinants to be generated), and a phage stock was harvested. A Cas9 spacer targeting *acrVIA1* was cloned into pAM307 to generate pAM377 and introduced into  $\Delta$ RM  $\Delta$ *spc*. The  $\phi$ LS46 stock passaged on  $\Delta$ RM  $\Delta$ *spc* carrying the pAM386 repair template was used to infect  $\Delta$ RM  $\Delta$ *spc* carrying pAM377, and Cas9-resistant escaper mutants were isolated. Two mutant phage isolates were Sanger sequenced across the *acrVIA1* gene, and found to contain the precise deletion.

#### In vitro RNA cleavage assays

10  $\mu$ M synthetic RNA substrates (listed in Table S1) were labeled with ATP [ $\gamma$ - $^{32}$ P] for 30 min at 37° with 1  $\mu$ l NEB T4 Polynucleotide Kinase, then purified using GE MicroSpin G-50 columns. In a 10  $\mu$ L reaction, 1 nM purified *L. seeligeri* Cas13-His6:crRNA complex was combined with 10 nM synthetic target RNA, in buffer containing 10mM HEPES pH 7.0, 150 mM NaCl, 5 mM MgCl<sub>2</sub>, 1 mM  $\beta$ -mercaptoethanol, and 5% glycerol, at room temperature for the indicated time. Reactions were quenched by addition of an equal volume of loading dye (95% formamide, 14 mM EDTA, 0.025% SDS, 0.04% bromophenol blue, 0.04% xylene cyanol), then denatured by boiling 5 min, then crash cooled on ice for 1 min before loading on denaturing TBE-Urea PAGE gels with 15% acrylamide. Reactions were exposed to phosphoscreen 1 hour and imaged with Beckman Coulter FLA7000IP Typhoon storage phosphorimager.

#### Co-immunoprecipitation

$\Delta$ CRISPR strains of *L. seeligeri* harboring pAM364 (Cas13-his6 cloned into a pPL2e backbone) and pAM395 (P<sub>tet</sub>-AcrVIA1-3xFlag cloned into a pAM326 backbone) along with empty vector controls, were cultured in 50 mL BHI supplemented with 50  $\mu$ g/mL kanamycin and 100 ng/mL aTc at 30°C until the OD<sub>600</sub> reached 0.7. 30 mL culture samples were harvested, pelleted by centrifugation at 8,000 rpm for 2min, and frozen at -80°C. Pellets were resuspended in 0.5 mL ice-cold lysis buffer (50 mM HEPES pH 7.0, 200 mM NaCl, 5 mM MgCl<sub>2</sub>, 5% glycerol, 1 mg/mL lysozyme, supplemented with Roche cOmplete EDTA-free protease inhibitor cocktail. Samples were incubated at 37°C for 5 min, then placed on ice and lysed by sonication. Insoluble material was pelleted by centrifugation at 15,000 rpm for 1 hr at 4°C. A “load” sample was harvested, then the remaining soluble fraction was applied to 30  $\mu$ L of pre-equilibrated ANTI-FLAG M2 Affinity Gel (Millipore-Sigma #A2220) for 4 hr at 4°C. The resin was pelleted by centrifugation at 2,000 rpm for 1 min, then the “unbound” sample was harvested. The resin was washed three times by centrifugation and resuspension in 1 mL wash buffer (20 mM HEPES pH 7.0, 200 mM NaCl, 5 mM MgCl<sub>2</sub>, 5% glycerol). All wash buffer was then removed, and the resin was resuspended in 40  $\mu$ L 2x Laemmli SDS-PAGE loading buffer lacking  $\beta$ -mercaptoethanol, and boiled for 5 min. The resin was pelleted and supernatant was harvested as the “IP” sample. 5%  $\beta$ -mercaptoethanol was added to all samples before separation on 4-20% acrylamide SDS-PAGE gels. For immunoblot analysis, proteins were transferred to a methanol-activated PVDF membrane, blocked with 5% nonfat milk, and probed with anti-His6 (Genscript #A00186), anti-Flag (Sigma #F3165) and anti- $\sigma^A$ <sup>*Bacillus subtilis*</sup> (34) primary antibodies, then with horseradish peroxidase-conjugated anti-mouse (Bio-Rad #170-5047) or anti-rabbit (Bio-Rad #170-

5046) secondary antibodies. Proteins were detected using Western Lightning Plus-ECL chemiluminescence reagent (Perkin-Elmer).

#### Electrophoretic mobility shift assay

Synthetic RNA substrates were radiolabeled as described for RNA cleavage assays. In vitro RNP assembly was performed for 30 min in a 10  $\mu$ L reaction at room temperature in the presence of 5mM HEPES pH 7, 10 mM NaCl, 1 mM BME, 5 mM MgCl<sub>2</sub>, 1  $\mu$ g/mL bovine serum albumin, 10  $\mu$ g/mL salmon sperm DNA, and 5% glycerol. Labeled RNA substrates were added at a final concentration of 10 nM, dCas13a (R445A, H450A, R1016A, H1021A) at 500 nM, and AcrVIA1 at 1800 nM. Reactions were placed on ice 1 min, then 10  $\mu$ L of non-denaturing loading dye (25% glycerol, 0.05% xylene cyanol, 0.05% bromophenol blue, 50 mM HEPES pH 7.0) was added, and samples were electrophoretically separated by 10% acrylamide native PAGE at 4°C. Gels were exposed and imaged as described for RNA cleavage assays.

#### RNA sequencing and analysis

*L. seeligeri*  $\Delta$ RM  $\Delta$ spc was infected with  $\phi$ LS46 at OD<sub>600</sub> of 0.5, MOI of 0.1 in BHI medium containing 5 mM CaCl<sub>2</sub> at 30°C. At each time point, 1.5 mL of culture was harvested, pelleted by centrifugation at 8,000 rpm for 2 min, and frozen at -80°C. To harvest RNA, samples were resuspended in 90  $\mu$ L of RNase-free phosphate-buffered saline containing 2 mg/mL lysozyme, and incubated at 37°C for 3 min. 10  $\mu$ L of 10% sarkosyl was immediately added to lyse the cells. 300  $\mu$ L of TRI Reagent (Zymo Research Direct-Zol RNA Miniprep Plus Kit) was added to each sample, then RNA was prepared according to the manufacturer's instructions, eluting in 50  $\mu$ L RNase-free water. Ribosomal RNA was removed from 1  $\mu$ g of purified RNA using the NEBNext rRNA Depletion Kit (Bacteria) according to the manufacturer's instructions. After rRNA removal, samples were concentrated using the Zymo Research RNA Clean and Concentrator-5 Kit according to the manufacturer's instructions, eluting RNA in 6  $\mu$ L RNase-free water. Libraries were prepared for deep sequencing using the Illumina TruSeq Stranded mRNA Library Preparation Kit, skipping mRNA purification and beginning at the RNA fragmentation step. Quality control of libraries was carried out on an Agilent TapeStation. Paired-end (2x75bp) sequencing was performed on the NextSeq platform. Raw paired-end reads were mapped to the  $\phi$ LS46 genome using Bowtie2 with parameters "very-sensitive" and I = 40. Using a custom script, the coverage at each position on the  $\phi$ LS46 genome was calculated by tallying a count for each of the positions covered by each mapped read. Read counts at each genomic position were normalized to the total number of reads in each library.

#### Protein Expression and Purification

The *L. seeligeri* type VI CRISPR array alongside Cas13a-His6 or dCas13a-His6 (R445A, H450A, R1016A, H1021A) were cloned into pAM8 as described in Table S1, and conjugated into *L. seeligeri*  $\Delta$ spc  $\Delta$ cas13a. For expression, these strains were cultured at 30 °C in BHI supplemented with 10  $\mu$ g/mL chloramphenicol for ~24 hr. Cells were harvested by centrifugation and resuspended in lysis buffer (20 mM Tris-HCl, pH 7.5, 300 mM NaCl, 5% glycerol, 20 mM imidazole, 7 mM  $\beta$ -mercaptoethanol). The harvested cells were then lysed by an EmulsiFlex-C3 homogenizer (Avestin) and centrifuged at

20,000 rpm for 30 min in a JA-20 fixed angle rotor (Avanti J-E series centrifuge, Beckman Coulter). The supernatant was applied to 5 mL HisPur™ Cobalt Resin (Thermo Fisher Scientific). The protein was eluted with lysis buffer supplemented with 500 mM imidazole after washing the column with 10 column volumes of lysis buffer. The elution fractions were further dialyzed against buffer A (20 mM Tris-HCl, pH 7.5, 100 mM NaCl, 7mM β-mercaptoethanol), and applied on a 1 mL HiTrap SP Fast flow column (GE Healthcare). Proteins were eluted by a linear gradient from 100 mM to 1 M NaCl in 20 column volumes, and then concentrated in 50 kDa molecular mass cut-off concentrators (Amicon) before further purification over a Superdex 200 increase 10/300 GL column (GE Healthcare) pre-equilibrated in buffer B (20 mM Tris, pH 7.5, 150 mM NaCl, 2 mM DTT).

AcrVIA1 was cloned into a pRSF-Duet-1 vector (Novagen), in which the *acrVIA1* gene was attached with N-terminal His6-SUMO tag following an ubiquitin-like protease (ULP1). The vector was transformed into *Escherichia coli* BL21 (DE3) strain and expressed by induction with 0.25 mM isopropyl-β-D-1-thiogalactopyranoside (GoldBio) at 16 °C for 20 hr. Cells were harvested by centrifugation and resuspended in lysis buffer (20 mM Tris-HCl, pH 7.5, 500 mM NaCl, 5% glycerol, 20 mM imidazole, 7 mM β-mercaptoethanol). The harvested cells were then lysed by an EmulsiFlex-C3 homogenizer (Avestin) and centrifuged at 20,000 rpm for 30 min in a JA-20 fixed angle rotor (Avanti J-E series centrifuge, Beckman Coulter). The supernatant was applied to 5 mL HisTrap Fast flow column (GE Healthcare). The protein was eluted with lysis buffer supplemented with 500 mM imidazole after washing the column with 10 column volumes of lysis buffer and 2 column volumes of lysis buffer supplemented with 40 mM imidazole. The elution fractions were further dialyzed against buffer A (20 mM Tris-HCl, pH 7.5, 100 mM NaCl, 7mM β-mercaptoethanol), and applied on a 5 mL HiTrap Q Fast flow column (GE Healthcare). Proteins were eluted by a linear gradient from 100 mM to 1 M NaCl in 20 column volumes, and then concentrated in 10 kDa molecular mass cut-off concentrators (Amicon) before further purification over a Superdex 200 increase 10/300 GL column (GE Healthcare) pre-equilibrated in buffer B (20 mM Tris, pH 7.5, 150 mM NaCl, 2 mM DTT).

*Leptotrichia buccalis* Cas13 purification was conducted as previously described(32), and the same samples were used in this study.

#### In Vitro Assembly of AcrVIA1-Cas13acrRNA Complex

To assemble the AcrVIA1-Cas13a<sup>crRNA</sup> complex, the purified Cas13a<sup>crRNA</sup> was mixed with AcrVIA1 at the molar ratio of 1:4 and incubated on ice for 30 min. The reconstructed complex was then purified by gel filtration chromatography over a Superdex 200 increase 10/300 GL column (GE Healthcare) pre-equilibrated in buffer B (20 mM Tris, pH 7.5, 150 mM NaCl, 2 mM DTT). The peak fractions containing AcrVIA1-Cas13a<sup>crRNA</sup> complex were concentrated in 50 kDa molecular mass cut-off concentrators (Amicon) and added with 5 mM MgCl<sub>2</sub> before grid preparation.

#### Cryo-EM Sample Preparation and Data Acquisition

3.0 μl of ~0.8 mg/ml purified Cas13a<sup>crRNA</sup> and AcrVIA1-Cas13a<sup>crRNA</sup> complex were applied onto glow-discharged UltrAuFoil 300 mesh R1.2/1.3 grids (Quantifoil), respectively. The grids were glow-discharged for 60 s at 0.37 mBar, 15 mA in a Pelco

easiGlow air system (TED PELLA). Grids were blotted with Vitrobot™ filter paper (Electron Microscopy Sciences) for 2s at ~100% humidity and flash frozen in liquid ethane using an FEI Vitrobot Mark IV. Images were collected on FEI Titan Krios electron microscope operated at an acceleration voltage of 300 kV with a Gatan K3 Summit detector with a 1.08 Å pixel size at Memorial Sloan Kettering Cancer Center. The defocus range was set from -1.0 µm to 2.5 µm. Movies were recorded in super-resolution mode at an exposure rate of 19.9 e<sup>-</sup>/ pixel /s with a total exposure time of 3 s, for an accumulated electron exposure of 49.3 e<sup>-</sup>/ Å<sup>2</sup>. Intermediate frames were recorded every 0.075 s for a total number of 40 frames.

### Image Processing

For Cas13a<sup>crRNA</sup> dataset, motion correction was performed with MotionCor2 (35). Contrast transfer function parameters were estimated by Ctffind4 (36). All other steps of image processing were performed by RELION 3 (37). Templates for automated particle selection were generated from 2D-averages of ~2,000 manually picked particles. Automated particle selection resulted in 4,085,566 particles from 3,249 images. After two rounds of 2D classification, a total of 1,263,761 particles were selected for 3D classification using the initial model generated by RELION as reference. Particles corresponding to the best class with the highest-resolution features were selected and subjected to the second round of 3D classification. One of 3D classes with good secondary structural features and the corresponding 443,629 particles were polished using RELION particle polishing, yielding an electron microscopy map with a resolution of 3.2 Å after 3D auto-refinement. A preferred orientation of the sample was observed during the cryo-EM reconstruction. Due to the observed directional anisotropy of the reconstruction, the corresponding 443,629 particles were further subjected to another round of 2D classification and some classes with similar orientations were discarded to reduce the impact of the preferred views on the resolution of final reconstruction. 190,543 particles were used for the final reconstruction with a resolution of 3.2 Å after 3D auto-refinement (Fig. S6). The directional resolution volumes were evaluated by the 3D FSC tool (38).

The dataset for AcrVIA1-Cas13a<sup>crRNA</sup> complex was processed by the same procedure as above. Briefly, 4,372,366 particles were autopicked from 3,806 images, 717,725 particles were selected for the final 3D reconstruction after two rounds of 2D and 3D classification, resulting in a AcrVIA1-Cas13a<sup>crRNA</sup> complex map with an overall resolution of 3.0 Å (Fig. S6).

All resolutions were estimated using RELION ‘post-processing’ by applying a soft mask around the protein density and the Fourier shell correlation (FSC) = 0.143 criterion. Local resolution estimates were calculated from two half data maps using cryoSPARC(39). Further details related to data processing and refinement are summarized in table S1.

### Atomic Model Building and Refinement

For the AcrVIA1-Cas13a<sup>crRNA</sup> complex, the initial models of Cas13a<sup>crRNA</sup> and AcrVIA1 were manually built in COOT based on the bulky side chains to register the sequence(40). All models were refined against summed maps using phenix.real\_space\_refine by applying geometric and secondary structure restraints. For Cas13a<sup>crRNA</sup> complex, the model of Cas13<sup>crRNA</sup> in AcrVIA1-Cas13a<sup>crRNA</sup> complex was



docked into the cryo-EM density map using UCSF Chimera (41) and then manually rebuilt in COOT (40). All models were refined against summed maps using phenix.real\_space\_refine (42) by applying geometric and secondary structure restraints. All figures were prepared by PyMol (<http://www.pymol.org>) or Chimera (41). The statistics for data collection and model refinement are shown in table S1.

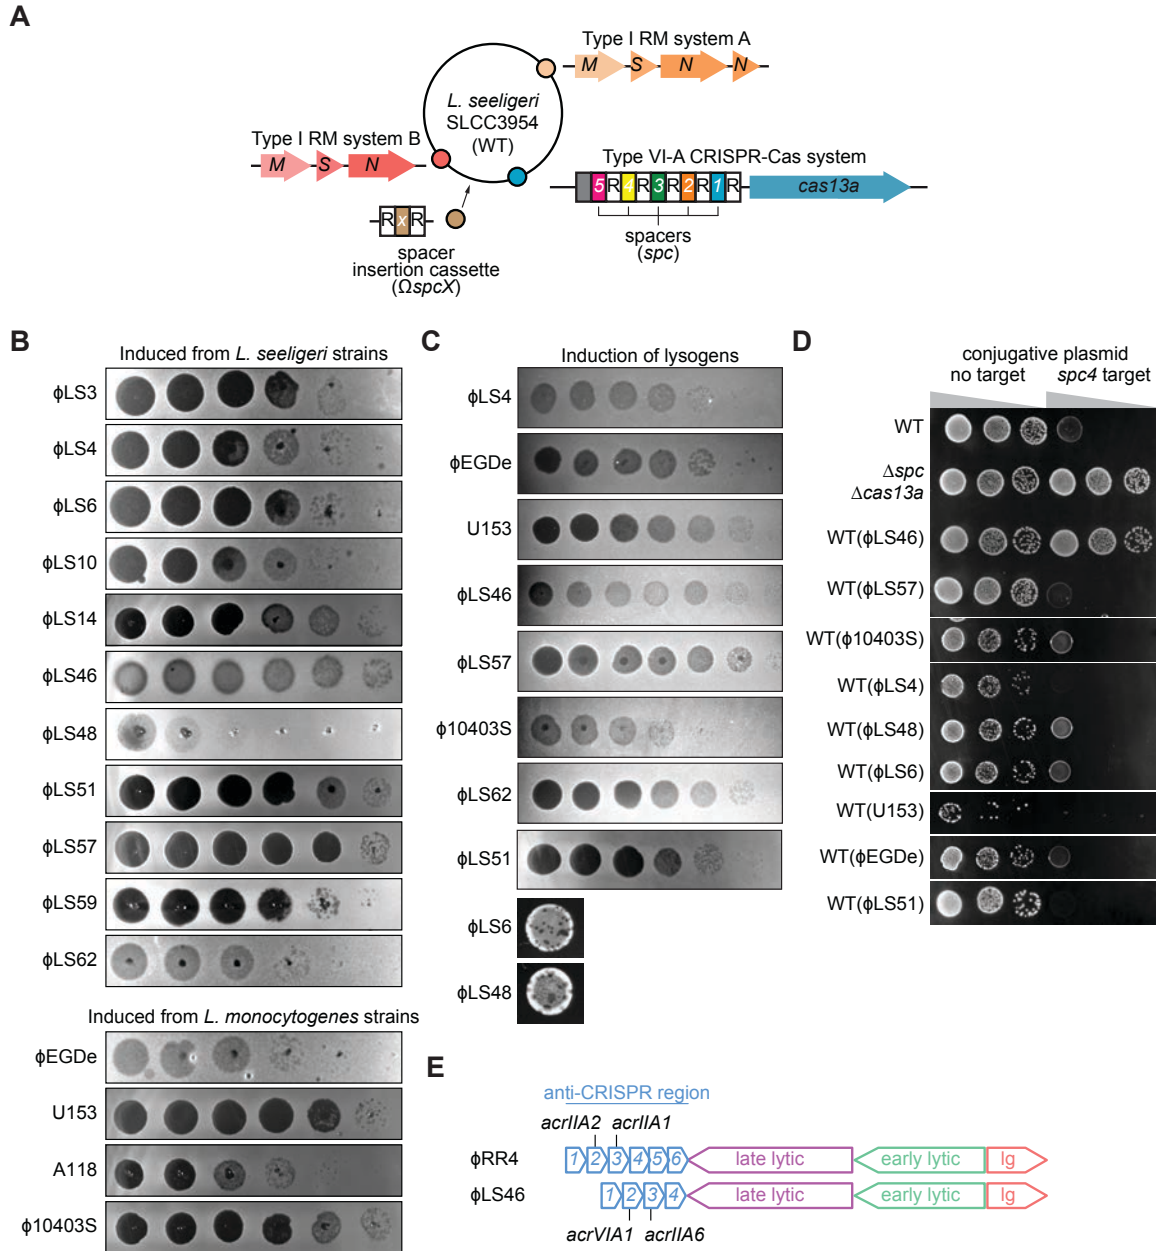

**Fig. S1: Acr screen in listeriophages.**

(A) Diagram of *L. seeligeri* SLCC3954 genetic elements modified during this study. (B) Detection of phages in lysates of *L. seeligeri* (11 phages isolated) or *L. monocytogenes* (4 phages isolated) strains after treatment with mitomycin C. Ten-fold dilutions of lysate were spotted on lawns of *L. seeligeri*  $\Delta$ RM  $\Delta$ spc. (C) Confirmation of lysogen formation by the phages isolated in (B). Putative lysogens were treated with mitomycin C to induce and detect integrated prophages. Ten-fold dilutions of induced culture filtrates from each lysogen were spotted on lawns of *L. seeligeri*  $\Delta$ RM  $\Delta$ spc. For  $\phi$ LS6 and  $\phi$ LS48, lysogens were less stable and spontaneous plaques were detectable during growth of the uninduced lysogen. (D) Transfer of a conjugative plasmid with or without the *spc4* target of the *L. seeligeri* SLCC3954 type VI-A CRISPR-Cas system into different strains: wild-

type (WT),  $\Delta spc \Delta cas13a$  or WT harboring the  $\phi LS46$ ,  $\phi LS57$ ,  $\phi 10403S$ ,  $\phi LS4$ ,  $\phi LS48$ ,  $\phi LS6$ , U153, or  $\phi EGDe$  prophages. Ten-fold dilutions of transconjugants were plated on selective media. (E) Comparison of the  $\phi RRR4$  and  $\phi LS46$  genomes, with *acr* regions highlighted in blue, and genes containing homology to known anti-CRISPRs indicated. The  $\phi RRR4$  and  $\phi LS46$  genomes are organized into four regions that can be classified according to gene function: these include an early lytic region containing predicted replicases and recombinases involved in phage circularization and genome replication; a late lytic region containing phage structural genes; and a lysogeny region containing transcriptional regulators and a predicted site-specific integrase. In  $\phi RRR4$ , the fourth region contains two predicted homologs of the Cas9 inhibitors AcrIIA1 and AcrIIA2, and our previous experiments showed that this region is not essential for phage viability but provides inhibitory activity against Cas9 from *Streptococcus pyogenes*. BLAST searches for each of the ORFs in the analogous operon in  $\phi LS46$  revealed no sequence-similarity for genes of known function, but a more sensitive HHpred search revealed similarity between the gp3 protein and AcrIIA6 from Streptococcus phage DT1. We therefore hypothesized that this operon may be an anti-CRISPR region in the  $\phi LS46$  genome.

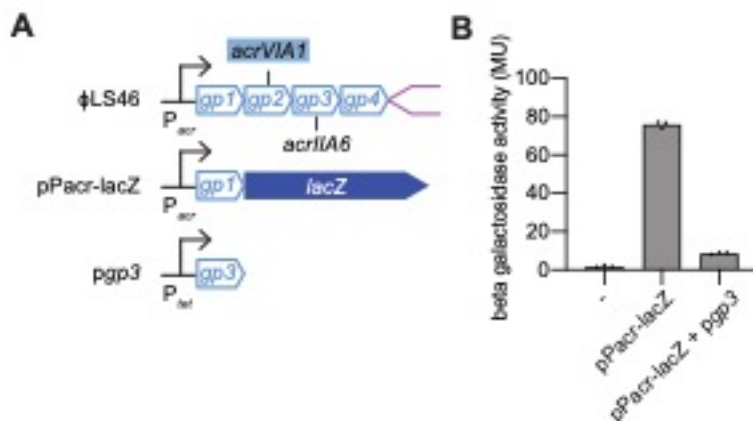

**Fig. S2:  $\phi$ LS46 *gp3* encodes an AcrIIA6 homolog that represses *acr* transcription.**

(A) Diagram of  $\phi$ LS46 *acr* operon containing four genes controlled by  $P_{acr}$  promoter. The plasmid pP<sub>acr</sub>-*lacZ* contains  $P_{acr}$  fused to a *lacZ* reporter to measure transcription from the promoter.  $P_{acr}$  transcription was measured in the presence and absence of *pgp3*, which expresses the *gp3* gene. (B) Autorepression of  $P_{acr}$  transcription by Gp3.  $\beta$ -galactosidase activity was measured in the absence of *lacZ* reporter (-), pP<sub>acr</sub>-*lacZ*, or pP<sub>acr</sub>-*lacZ* in the presence of *pgp3*. Data from 3 biological replicates are shown.

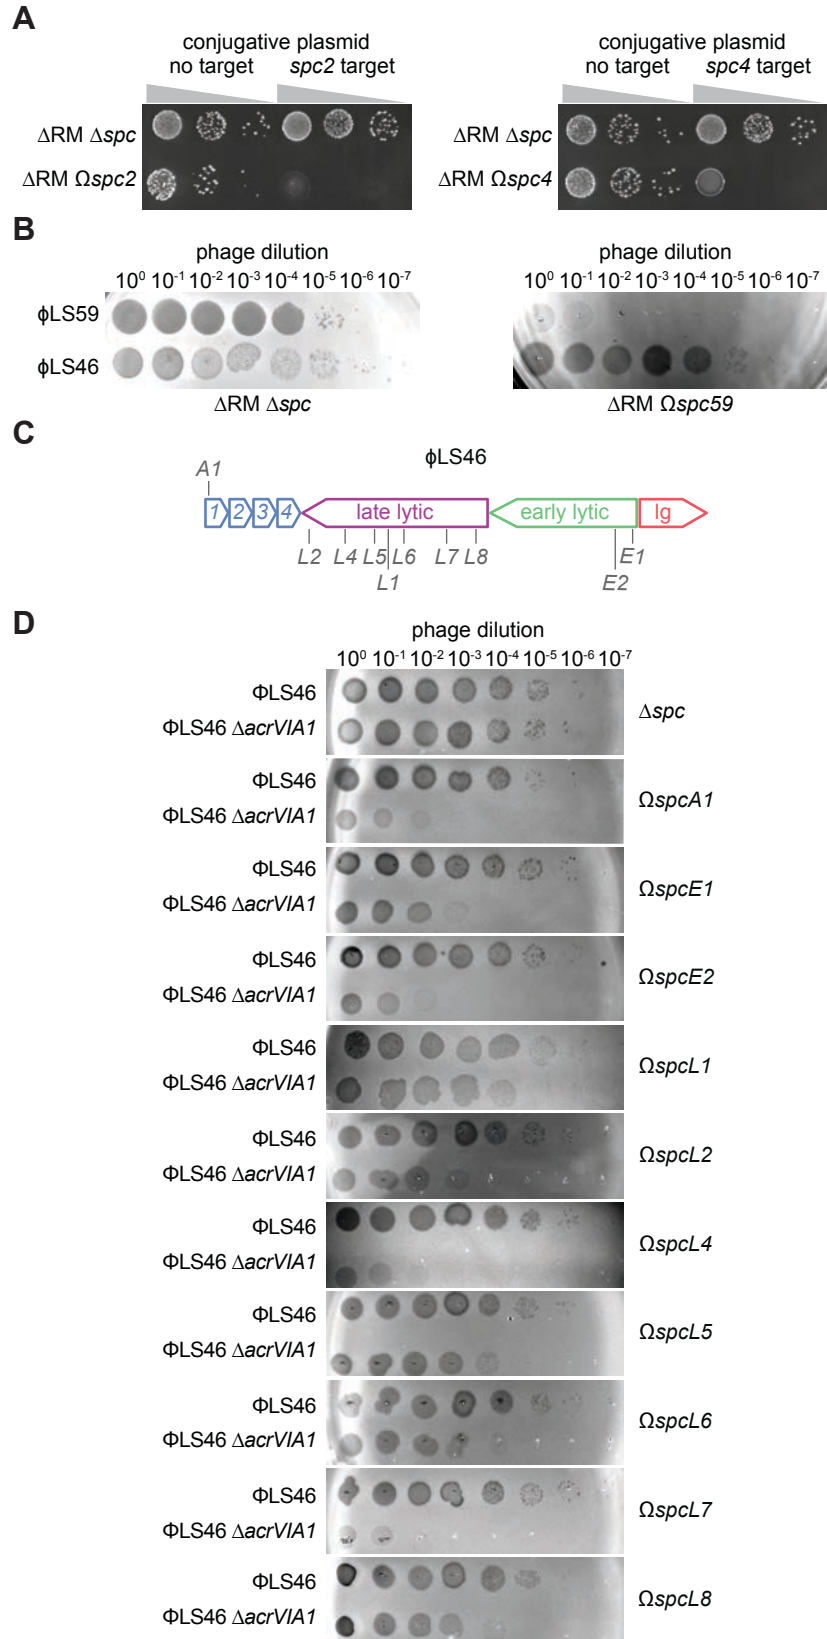

**Fig. S3: AcrVIA1 inhibits type VI-A CRISPR-Cas targeting of plasmids and phages.**

(A) Transfer of a conjugative plasmid with or without the *spc2* or *spc4* target of the *L. seeligeri* SLCC3954 type VI-A CRISPR-Cas system into strains  $\Delta$ RM  $\Delta$ *spc*,  $\Delta$ RM  $\Omega$ *spc2* or  $\Delta$ RM  $\Omega$ *spc4*. Ten-fold dilutions of transconjugants were plated on selective media. (B) Detection of phage propagation after spotting ten-fold dilutions of the phages  $\phi$ LS46 or  $\phi$ LS59, on lawns of *L. seeligeri*  $\Delta$ RM  $\Delta$ *spc* or  $\Delta$ RM  $\Omega$ *spc59*. (C) Schematic of the  $\phi$ LS46 genome showing the four main transcription units (*acr* in blue; lysogeny cassette in red; early- and late-expressed lytic genes in green and purple, respectively). The location of the targets of the spacers used in this study are shown in grey. Top and bottom locations refer to the DNA strand that is transcribed to produce a target transcript that is complementary to the crRNA derived from each spacer. (C) Same as (B) but spotting phages  $\phi$ LS46 or  $\phi$ LS46  $\Delta$ *acrVIA1* on lawns of bacteria expressing crRNAs from the spacers shown in (C).

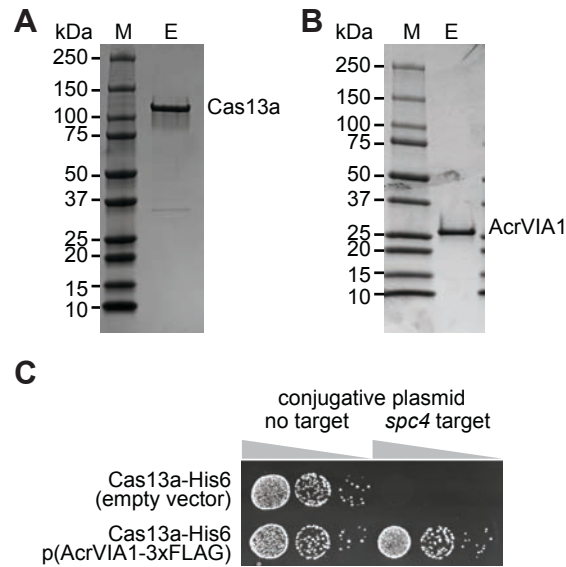

**Fig. S4: Purification and functional test of Cas13a-His6 and AcrVIA1-3xFLAG**

(A) SDS-PAGE of Cas13a-His6 after expression and purification from *L. seeligeri*. M, protein size marker; E, elution. (B) Same as (A) but for AcrVIA1 purified from *E. coli*. (C) Transfer of a conjugative plasmid with or without the *spc4* target of the *L. seeligeri* SLCC3954 type VI-A CRISPR-Cas system into *L. seeligeri* strains expressing Cas13a-His6 and harboring either an empty vector or p(AcrVIA1-3xFLAG). Three ten-fold dilutions of transconjugants were plated on selective media.

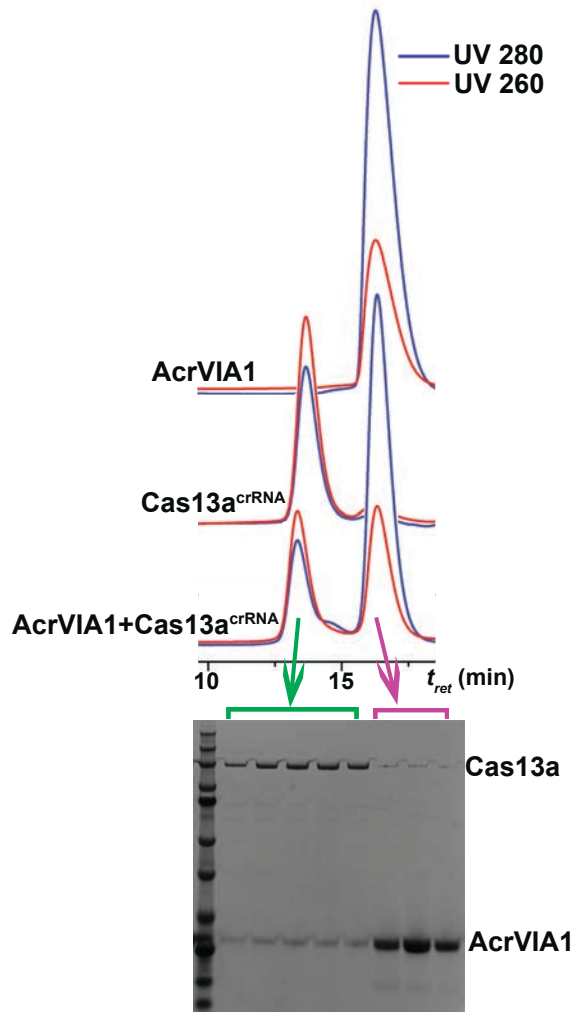

**Fig. S5: AcrVIA1 directly interacts with Cas13a<sup>crRNA</sup> on complex formation.** Gel filtration profiles of AcrVIA1 (upper panel), Cas13a<sup>crRNA</sup> (middle panel), and AcrVIA1 bound to Cas13a<sup>crRNA</sup> (bottom panel). Lower insert shows SDS-PAGE profile of AcrVIA1 with Cas13a<sup>crRNA</sup> after gel filtration.



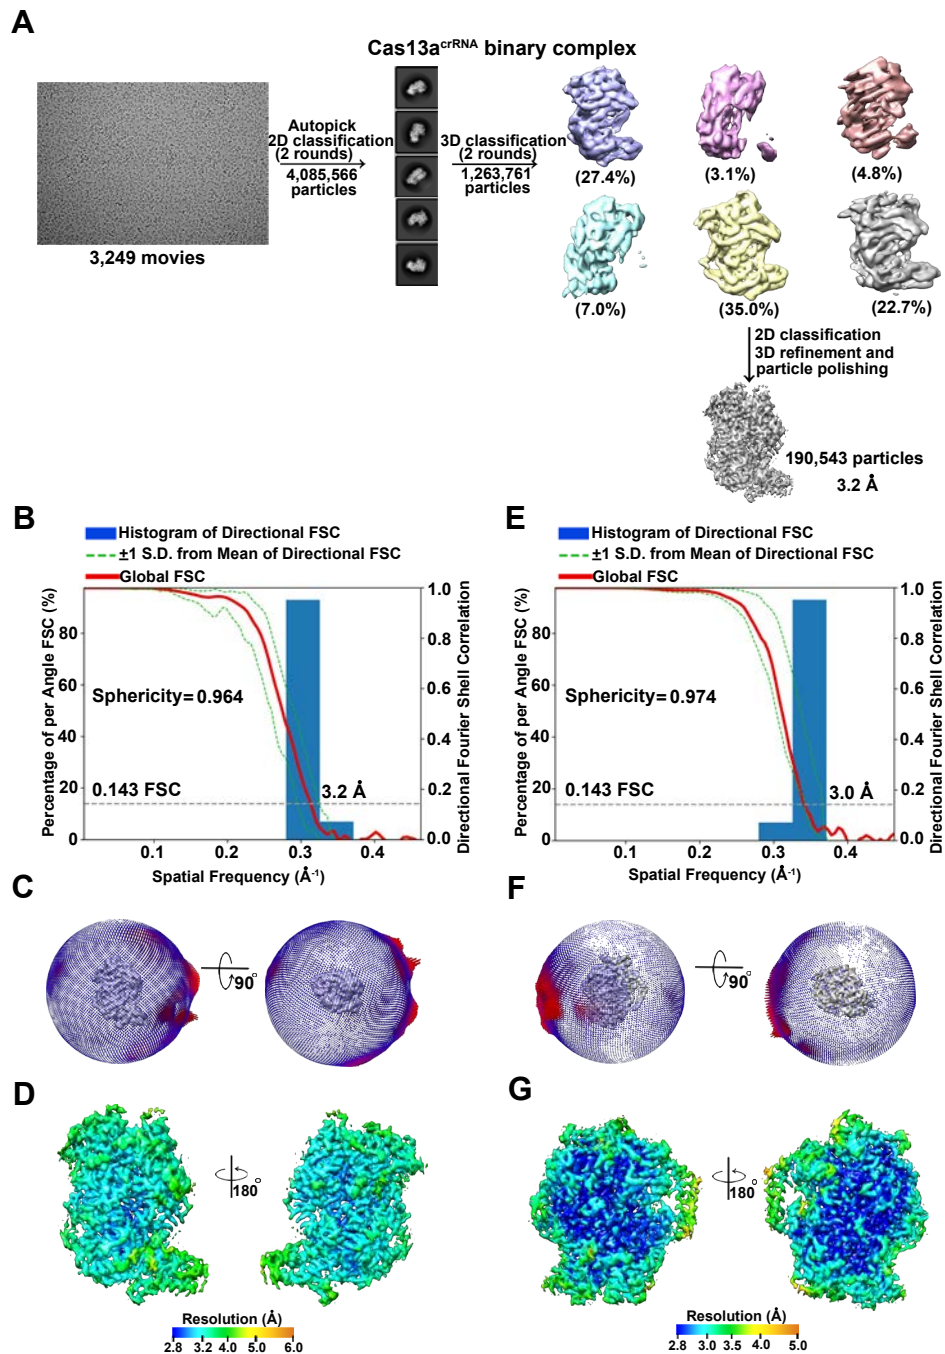

**Fig. S6: Cryo-EM Reconstruction of Cas13a<sup>crRNA</sup> and AcrVIA1-Cas13a<sup>crRNA</sup> complexes.**

(A) Flow chart of image processing for Cas13a<sup>crRNA</sup> binary complex. (B and E) Fourier Shell Correlation (FSC) curve of Cas13a<sup>crRNA</sup> (B) and AcrVIA1-Cas13a<sup>crRNA</sup> complex (E) and between two half maps that were calculated from two half datasets, and between the cryo-EM map and corresponding model. (C and F) Euler angle distribution of cryo-EM particles for calculating the final EM map of Cas13a<sup>crRNA</sup> (C) and AcrVIA1-Cas13a<sup>crRNA</sup> complex (F). The position of each sphere relative to the density map (gray in the center) corresponds to its angular assignment, with the radius of sphere proportional to the

number of particles in that orientation. Preferred orientations of both samples were observed during the cryo-EM reconstruction. **(D and G)** Final 3D reconstructed map of Cas13a<sup>crRNA</sup> **(D)** and AcrVIA1-Cas13a<sup>crRNA</sup> complex **(G)** colored according to local resolution.

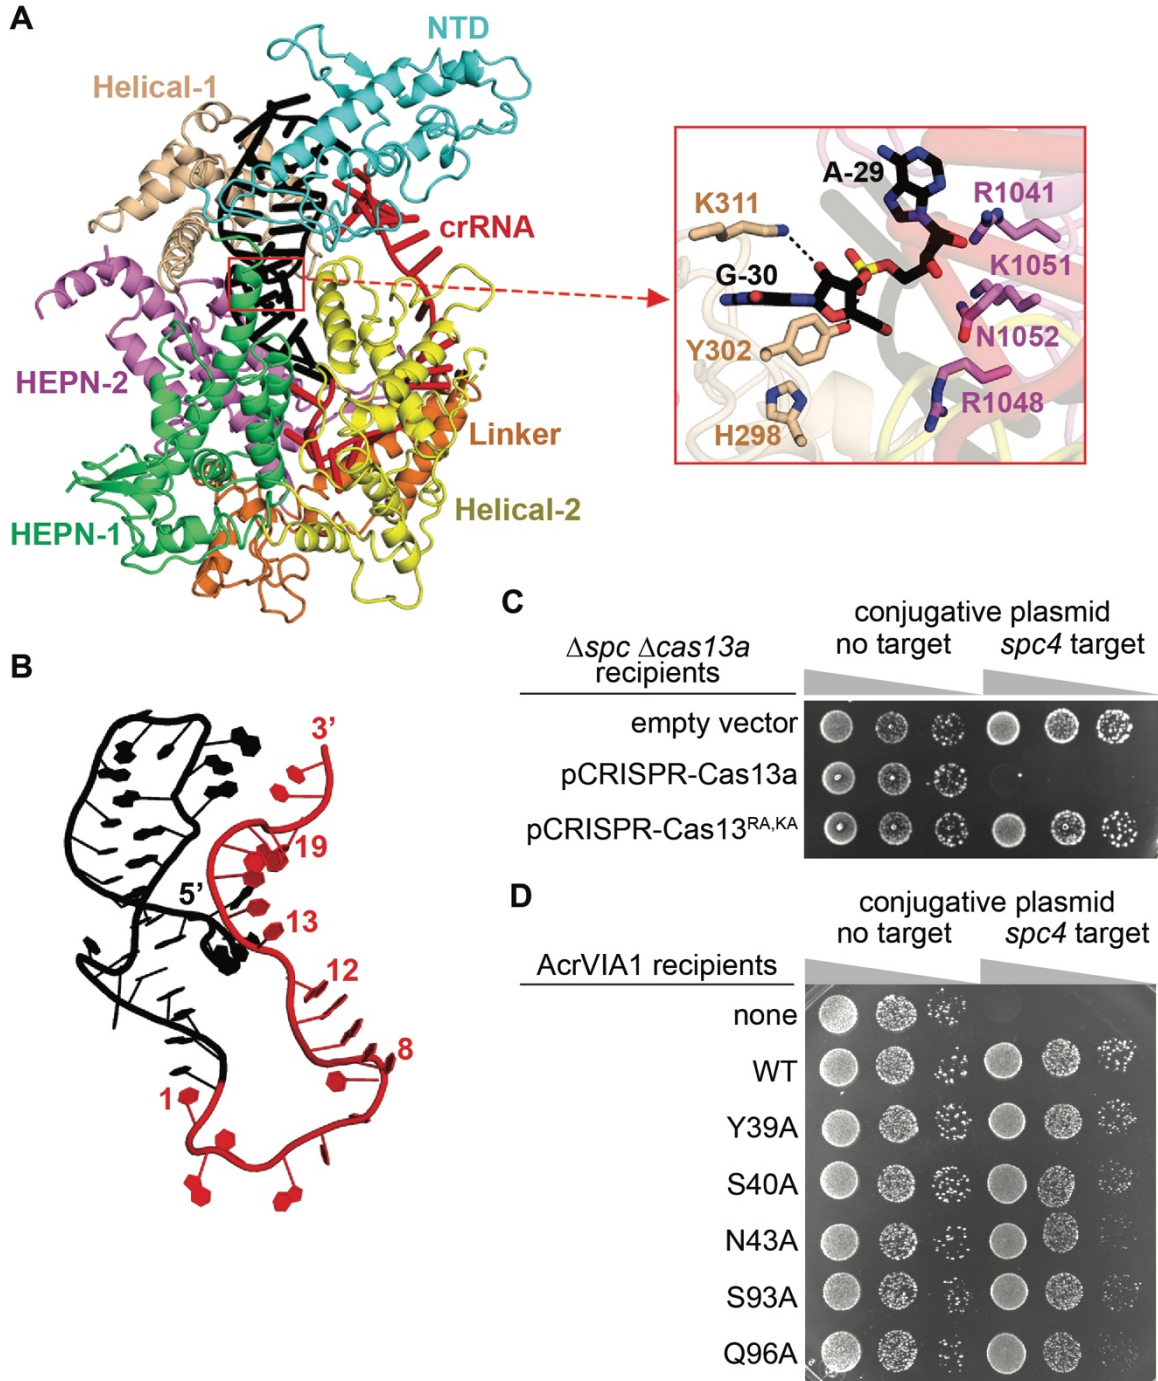

**Fig. S7: crRNA alignment in Cas13a<sup>crRNA</sup>**

(A) Cryo-EM structure of Cas13a<sup>crRNA</sup>. The insert shows detailed interactions between Cas13a and the cleavage site of pre-crRNA. The repeat and spacer regions within crRNA are shown in black and red, respectively. (B) Structure of crRNA in Cas13a<sup>crRNA</sup>. A stacking alignment is observed for segments 8 to 12 and 13 to 19. (C) Transfer of a conjugative plasmid with or without the *spc4* target of the *L. seeligeri* type VI-A CRISPR-Cas system into  $\Delta spc \Delta cas13a$  harboring plasmids expressing wild-type or mutant (R1048A, K1049A) Cas13a. (D) Transfer of a conjugative plasmid with or

without the *spc4* target of the *L. seeligeri* type VI-A CRISPR-Cas system into wild-type *L. seeligeri* harboring *pgp2* plasmids expressing wild-type or mutant different mutant versions of AcrVIA1.

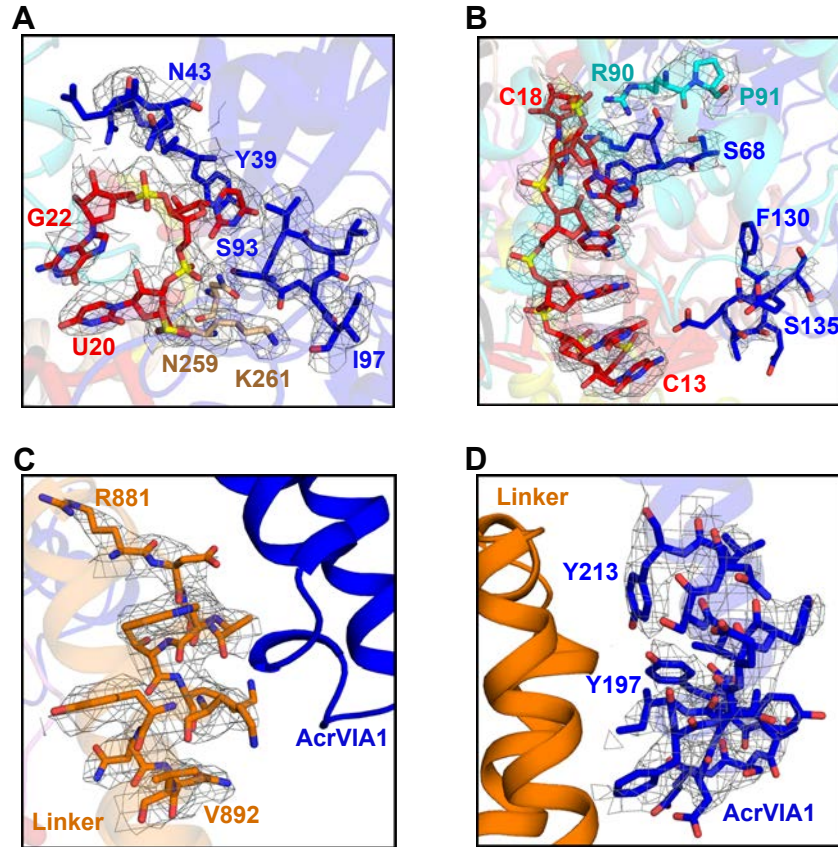

**Fig. S8: EM densities for representative interfaces between AcrVIA1 and Cas13a<sup>crRNA</sup>.**

(A) EM densities for interface shown in Fig. 3F. (B) EM densities for interface shown in Fig. 3G. (C and D) EM densities for interface shown in Fig. 3H. The maps are contoured at  $5\sigma$ .

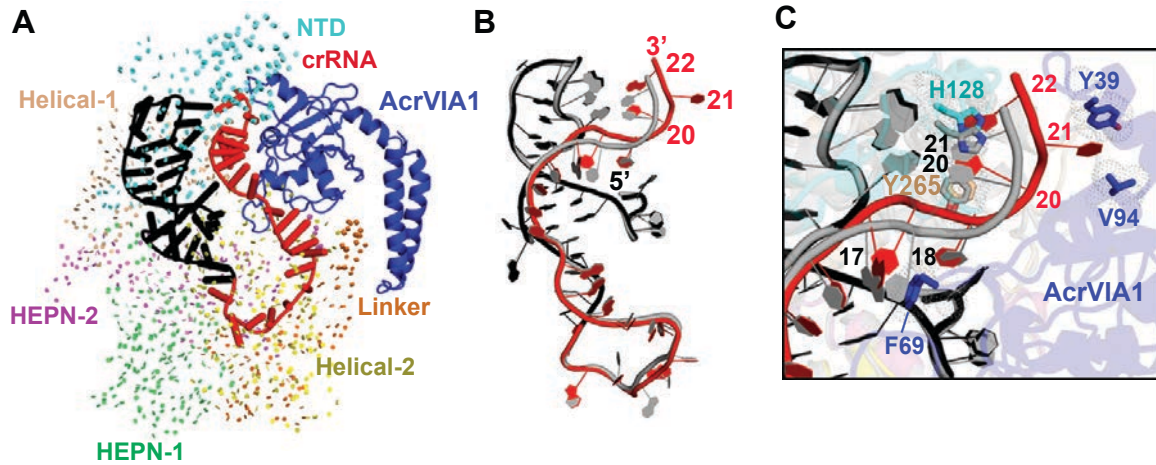

**Fig. S9: Structural comparison of Cas13a<sup>crRNA</sup> and AcrVIA1-Cas13a<sup>crRNA</sup> complex.**

(A) Structure comparison following superposition of Cas13a<sup>crRNA</sup> and AcrVIA1-Cas13a<sup>crRNA</sup> complex. Vector length correlates with the domain movement scale. AcrVIA1 and crRNA originate from the AcrVIA1-Cas13a<sup>crRNA</sup> complex. (B) Superposition of crRNA in Cas13a<sup>crRNA</sup> (in grey) and AcrVIA1-Cas13a<sup>crRNA</sup> complex (in red). (C) Detailed presentation of binding mode of 3' end of crRNA in Cas13a<sup>crRNA</sup> (in grey) and AcrVIA1-Cas13a<sup>crRNA</sup> complex (in red).

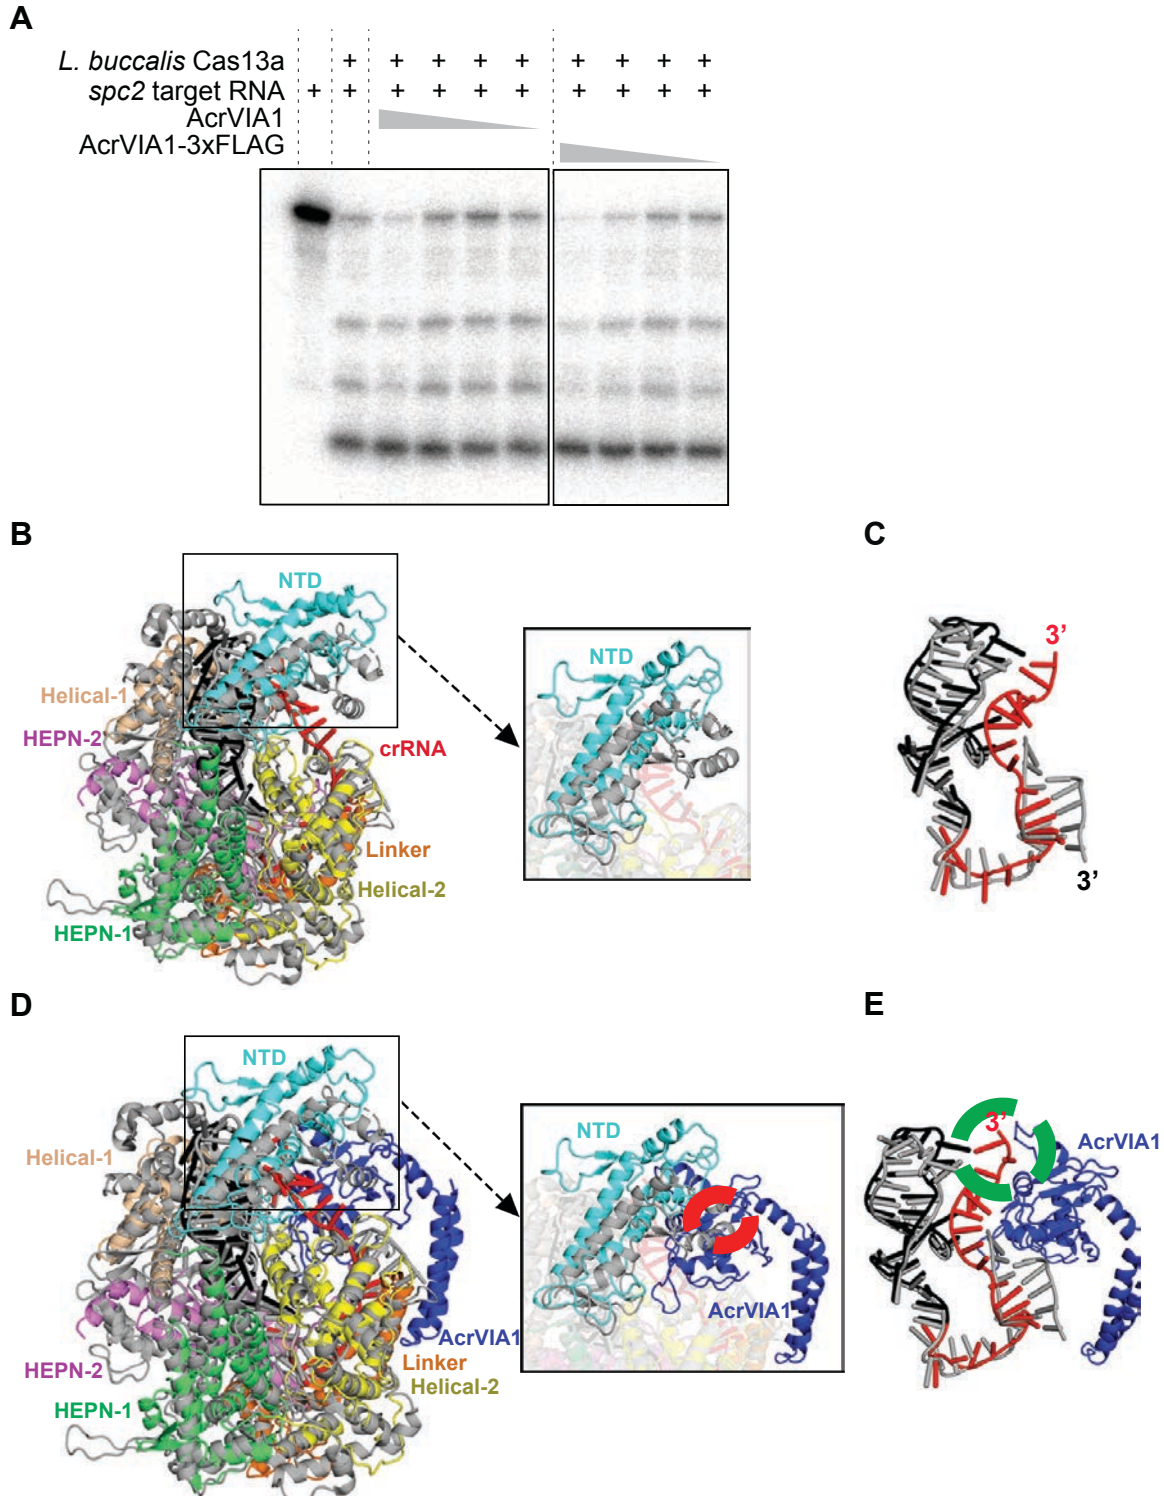

**Fig. S10: Comparison of *Listeria seeligeri* Cas13a with *Leptotrichia buccalis* Cas13a.** (A) AcrVIA1 does not inhibit *Leptotrichia buccalis* Cas13a. *cis*-RNA cleavage time course with purified *L. buccalis* Cas13a, AcrVIA1 and/or AcrVIA1-3xFLAG using radiolabeled *spc2*-target RNA substrates. Cas13a was present at 10nM, synthetic crRNA at 10nM, and AcrVIA1 or AcrVIA1-3xFLAG was added at 400, 100, 10, or 1 nM. The

products of degradation after 5, 10, and 20 minutes were analyzed by denaturing PAGE. **(B)** Structural comparison following superposition of *L. seeligeri* Cas13<sup>crRNA</sup> (in color) with *L. buccalis* Cas13a<sup>crRNA</sup> (in grey, PDB 5XWY). The insert presents the structural differences between NTD domains in the two species of Cas13a. **(C)** Structural comparison of crRNA in *L. seeligeri* Cas13a<sup>crRNA</sup> (in color) with *L. buccalis* Cas13a<sup>crRNA</sup> (in grey). **(D)** Structural comparison following superposition of *L. seeligeri* AcrVIA1-Cas13a<sup>crRNA</sup> (in color) with *L. buccalis* Cas13a<sup>crRNA</sup> (in grey). The insert presents the structural differences of the NTD domain of Cas13a in the two systems. The clashes between AcrVIA1 and NTD domain in *L. buccalis* Cas13a<sup>crRNA</sup> (in grey) are shown in red circle. **(E)** Structure comparison of crRNA in Cas13a<sup>crRNA</sup> (in color) with *L. buccalis* Cas13a<sup>crRNA</sup> (in grey). The missing interactions between AcrVIA1 and crRNA in *L. buccalis* Cas13a<sup>crRNA</sup> (in grey) are shown in green circle.



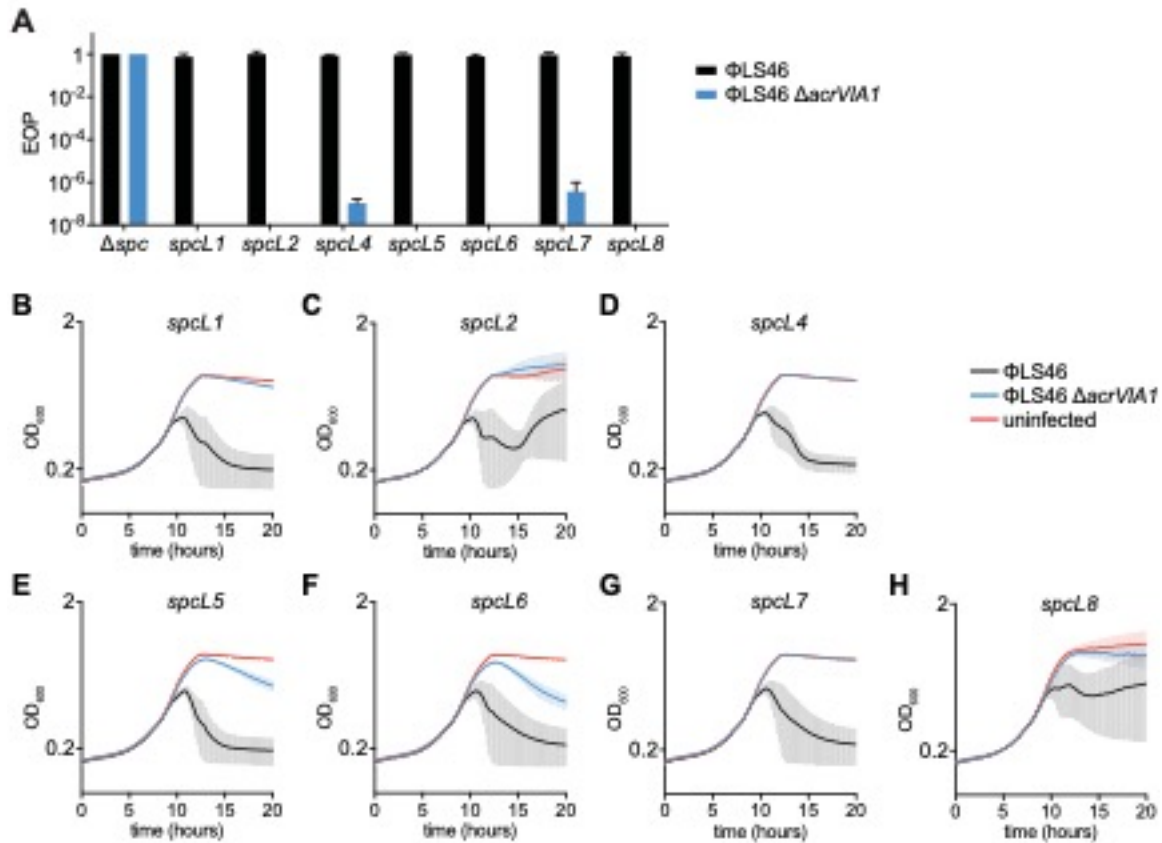

**Fig. S11: AcrVIA1 enables full phage escape from type VIA CRISPR-Cas immunity.**

(A) Efficiency of plaquing (relative to the number of plaques formed in lawns of *L. seeligeri* ( $\Delta$ RM  $\Delta$ spc)) of phages  $\phi$ LS46 or  $\phi$ LS46  $\Delta$ acrVIA1 in lawns of bacteria expressing *spcL1*, *spcL2*, *spcL4*, *spcL5*, *spcL6*, *spcL7* or *spcL8*. These spacers target transcripts produced by the late-expressed region of  $\phi$ LS46; shown in Figure S3C (B-H) Growth of *L. seeligeri* ( $\Delta$ RM  $\Omega$ spcL1), ( $\Delta$ RM  $\Omega$ spcL2), ( $\Delta$ RM  $\Omega$ spcL4), ( $\Delta$ RM  $\Omega$ spcL5), ( $\Delta$ RM  $\Omega$ spcL6), ( $\Delta$ RM  $\Omega$ spcL7) and ( $\Delta$ RM  $\Omega$ spcL8), measured as OD<sub>600</sub> over time, infected with  $\phi$ LS46 or  $\phi$ LS46  $\Delta$ acrVIA1 phages, or uninfected. The average curves of three biological replicates are reported, with +/- SEM values shown in lighter colors.

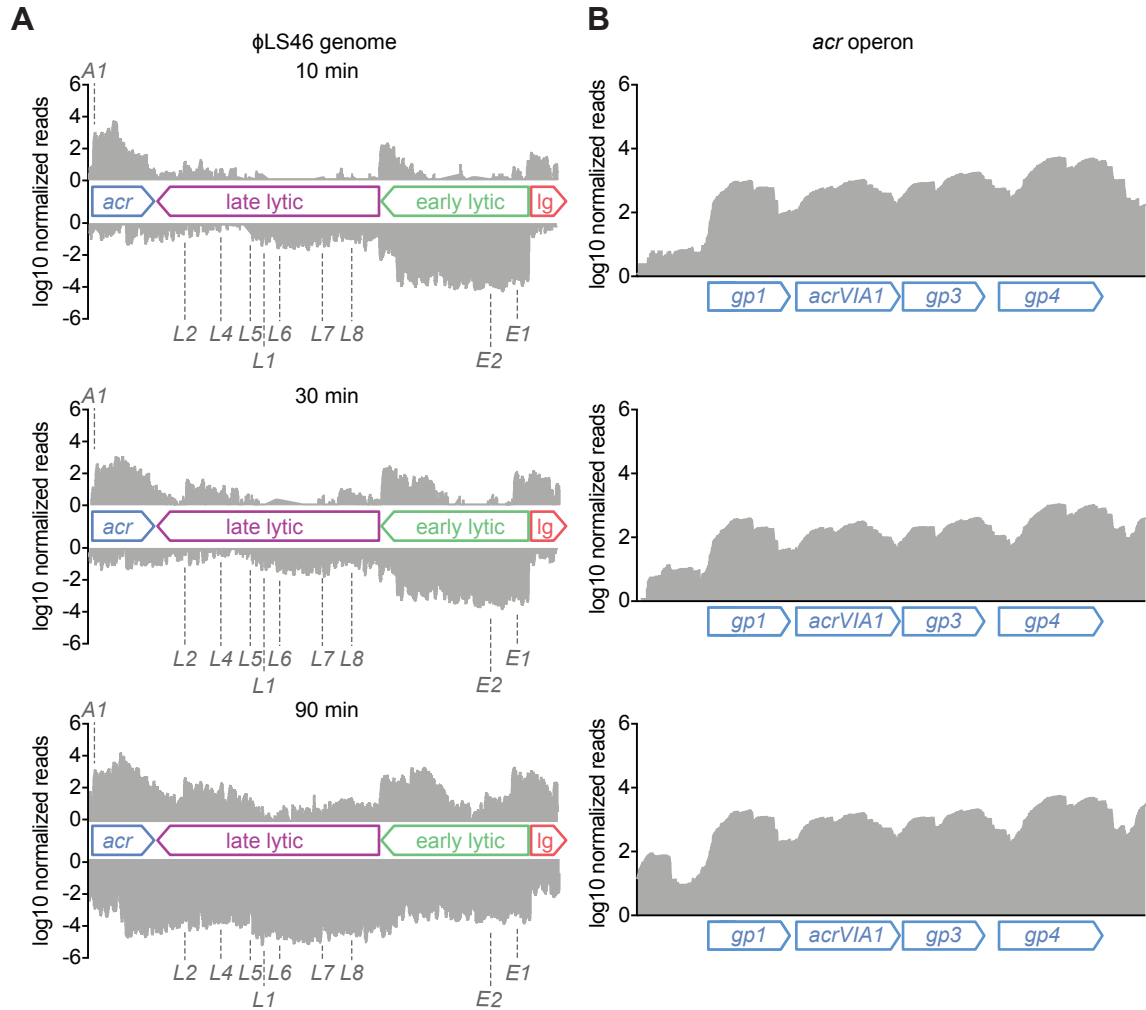

**Fig. S12: RNA-seq during  $\phi$ LS46 infection.**

(A) Strand-specific read coverage of phage-mapped reads is plotted along the  $\phi$ LS46 genome, and normalized to total reads in each sample. Targeting location of the spacers used in this study is also shown. The average of two biological replicates is shown. (B) Zoom-in of read coverage for the *acr* region of  $\phi$ LS46, showing co-operonic transcription of the four genes at both early and late time points during the phage life cycle. The average of two biological replicates is shown.

**Table S1. Cryo-EM Statistics for Data Collection and Model Refinement.**

|                                                     | Cas13a <sup>crRNA</sup> | AcrVIA1-Cas13a <sup>crRNA</sup> |
|-----------------------------------------------------|-------------------------|---------------------------------|
| <b>Data collection and processing</b>               |                         |                                 |
| Microscope                                          | Titan Krios             | Titan Krios                     |
| Detector                                            | Gatan K3                | Gatan K3                        |
| Automation software                                 | SerialEM                | SerialEM                        |
| Nominal magnification                               | 22,500                  | 22,500                          |
| Calibrated magnification                            | 47,262                  | 47,262                          |
| Voltage (kV)                                        | 300 kV                  | 300 kV                          |
| Electron exposure (e <sup>-</sup> /Å <sup>2</sup> ) | 49.3                    | 49.3                            |
| Exposure rate (e <sup>-</sup> /pixel/s)             | 19.9                    | 19.9                            |
| Number of frames collected                          | 40                      | 40                              |
| Defocus range (μm)                                  | -1.0 to -2.5            | -1.0 to -2.5                    |
| Pixel size (Å)                                      | 1.08                    | 1.08                            |
| Micrographs (collected/used)                        | 4,465/3,249             | 4,398/3,806                     |
| Total extracted particles (no.)                     | 4,085,566               | 4,372,366                       |
| Refined particles (no.)                             | 2,929,591               | 3,070,831                       |
| Final particles (no.)                               | 190,543                 | 717,725                         |
| Estimated accuracy of translations/rotations        | 0.749/2.479             | 0.513/2.160                     |
| Resolution (global)                                 |                         |                                 |
| FSC 0.5 (unmasked/masked, Å)                        | 4.2/3.6                 | 3.6/3.2                         |
| FSC 0.143 (unmasked/masked, Å)                      | 3.6/3.2                 | 3.2/3.0                         |
| Resolution range (local, Å)                         | 2.8~6.5                 | 2.8~5.5                         |
| Resolution range due to anisotropy (Å)              | 3.2~3.5                 | 2.8~3.0                         |
| Map sharpening B factor (Å <sup>2</sup> )           | -126.35                 | -100.0                          |
| <b>Refinement</b>                                   |                         |                                 |
| Refinement package                                  | Phenix                  | Phenix                          |
| Model resolution (Å)                                | 3.22                    | 2.98                            |
| FSC threshold                                       | 0.5                     | 0.5                             |
| Map Correlation Coefficient                         | 0.77                    | 0.79                            |
| Model composition                                   |                         |                                 |
| Protein residues                                    | 1,007                   | 1,257                           |
| Nonhydrogen atoms                                   | 9,429                   | 11,404                          |
| R.m.s. deviations                                   |                         |                                 |
| Bond lengths (Å)                                    | 0.004                   | 0.009                           |
| Bond angles (°)                                     | 0.864                   | 1.107                           |
| Validation                                          |                         |                                 |
| MolProbity score                                    | 1.46                    | 1.47                            |
| Clashscore                                          | 2.55                    | 2.21                            |
| Poor rotamers (%)                                   | 0.21                    | 0.51                            |
| Ramachandran plot                                   |                         |                                 |
| Favored (%)                                         | 92.2                    | 92.1                            |
| Allowed (%)                                         | 7.8                     | 7.9                             |
| Disallowed (%)                                      | 0                       | 0                               |
| C-β deviations (%)                                  | 0                       | 0                               |
| CaBLAM outliers (%)                                 | 0.88                    | 0.48                            |

|                            |           |           |
|----------------------------|-----------|-----------|
| EM-Ringer Score            | 3.50      | 3.29      |
| Average B-factors          |           |           |
| protein ( $\text{\AA}^2$ ) | 37.17     | 31.67     |
| RNA ( $\text{\AA}^2$ )     | 37.81     | 30.47     |
| PDB code                   | 6VRC      | 6VRB      |
| EMDB code                  | EMD-21367 | EMD-21366 |

---

**Table S2. Bacterial strains used in this study.**

| <b>Species</b>      | <b>Strain</b> | <b>Alias</b> | <b>Genotype</b> | <b>Origin</b> |
|---------------------|---------------|--------------|-----------------|---------------|
| <i>L. seeligeri</i> | LS1           | wild-type    | wild type       | ATCC SLCC3954 |
| <i>L. seeligeri</i> | LS2           | RR4          | wild type       | (43)          |
| <i>L. seeligeri</i> | LS3           | FSL N1-067   | wild type       | FSL, Cornell  |
| <i>L. seeligeri</i> | LS4           | FSL H6-011   | wild type       | FSL, Cornell  |
| <i>L. seeligeri</i> | LS5           | FSL H6-169   | wild type       | FSL, Cornell  |
| <i>L. seeligeri</i> | LS6           | ATCC 51334   | wild type       | ATCC          |
| <i>L. seeligeri</i> | LS7           | ATCC 51335   | wild type       | ATCC          |
| <i>L. seeligeri</i> | LS8           | FSL S4-0171  | wild type       | FSL, Cornell  |
| <i>L. seeligeri</i> | LS9           | FSL B8-0099  | wild type       | FSL, Cornell  |
| <i>L. seeligeri</i> | LS10          | FSL C7-0024  | wild type       | FSL, Cornell  |
| <i>L. seeligeri</i> | LS11          | FSL S10-0305 | wild type       | FSL, Cornell  |
| <i>L. seeligeri</i> | LS12          | FSL B8-0287  | wild type       | FSL, Cornell  |
| <i>L. seeligeri</i> | LS13          | FSL C7-0049  | wild type       | FSL, Cornell  |
| <i>L. seeligeri</i> | LS14          | FSL H6-0007  | wild type       | FSL, Cornell  |
| <i>L. seeligeri</i> | LS15          | FSL C7-0030  | wild type       | FSL, Cornell  |
| <i>L. seeligeri</i> | LS16          | FSL S4-0116  | wild type       | FSL, Cornell  |
| <i>L. seeligeri</i> | LS17          | FSL S10-0823 | wild type       | FSL, Cornell  |
| <i>L. seeligeri</i> | LS18          | FSL B8-0050  | wild type       | FSL, Cornell  |
| <i>L. seeligeri</i> | LS19          | FSL C7-0481  | wild type       | FSL, Cornell  |
| <i>L. seeligeri</i> | LS20          | FSL T4-0118  | wild type       | FSL, Cornell  |
| <i>L. seeligeri</i> | LS21          | FSL S4-0037  | wild type       | FSL, Cornell  |
| <i>L. seeligeri</i> | LS22          | FSL C7-0115  | wild type       | FSL, Cornell  |
| <i>L. seeligeri</i> | LS23          | FSL S4-0039  | wild type       | FSL, Cornell  |
| <i>L. seeligeri</i> | LS24          | FSL S10-1784 | wild type       | FSL, Cornell  |
| <i>L. seeligeri</i> | LS25          | FSL B8-0253  | wild type       | FSL, Cornell  |
| <i>L. seeligeri</i> | LS26          | FSL C7-0156  | wild type       | FSL, Cornell  |
| <i>L. seeligeri</i> | LS27          | FSL S10-0300 | wild type       | FSL, Cornell  |
| <i>L. seeligeri</i> | LS28          | FSL C7-0082  | wild type       | FSL, Cornell  |
| <i>L. seeligeri</i> | LS29          | FSL L5-0045  | wild type       | FSL, Cornell  |
| <i>L. seeligeri</i> | LS30          | FSL S10-0030 | wild type       | FSL, Cornell  |
| <i>L. seeligeri</i> | LS31          | FSL F6-1136  | wild type       | FSL, Cornell  |
| <i>L. seeligeri</i> | LS32          | FSL L5-0086  | wild type       | FSL, Cornell  |
| <i>L. seeligeri</i> | LS33          | FSL S10-1611 | wild type       | FSL, Cornell  |
| <i>L. seeligeri</i> | LS34          | FSL R9-8498  | wild type       | FSL, Cornell  |
| <i>L. seeligeri</i> | LS35          | FSL C7-0251  | wild type       | FSL, Cornell  |
| <i>L. seeligeri</i> | LS36          | FSL M6-0039  | wild type       | FSL, Cornell  |
| <i>L. seeligeri</i> | LS37          | FSL S10-2970 | wild type       | FSL, Cornell  |

|                     |          |              |                                                                                                     |                 |
|---------------------|----------|--------------|-----------------------------------------------------------------------------------------------------|-----------------|
| <i>L. seeligeri</i> | LS38     | FSL C7-0134  | wild type                                                                                           | FSL, Cornell    |
| <i>L. seeligeri</i> | LS39     | FSL C7-0462  | wild type                                                                                           | FSL, Cornell    |
| <i>L. seeligeri</i> | LS40     | FSL S10-1769 | wild type                                                                                           | FSL, Cornell    |
| <i>L. seeligeri</i> | LS41     | FSL H6-0027  | wild type                                                                                           | FSL, Cornell    |
| <i>L. seeligeri</i> | LS42     | FSL R8-6874  | wild type                                                                                           | FSL, Cornell    |
| <i>L. seeligeri</i> | LS43     | FSL S4-0544  | wild type                                                                                           | FSL, Cornell    |
| <i>L. seeligeri</i> | LS44     | FSL S4-0616  | wild type                                                                                           | FSL, Cornell    |
| <i>L. seeligeri</i> | LS45     | FSL S4-0939  | wild type                                                                                           | FSL, Cornell    |
| <i>L. seeligeri</i> | LS46     | FSL C7-0218  | wild type                                                                                           | FSL, Cornell    |
| <i>L. seeligeri</i> | LS47     | FSL C7-0499  | wild type                                                                                           | FSL, Cornell    |
| <i>L. seeligeri</i> | LS48     | FSL S6-0001  | wild type                                                                                           | FSL, Cornell    |
| <i>L. seeligeri</i> | LS49     | FSL L5-0058  | wild type                                                                                           | FSL, Cornell    |
| <i>L. seeligeri</i> | LS50     | FSL A5-0405  | wild type                                                                                           | FSL, Cornell    |
| <i>L. seeligeri</i> | LS51     | FSL C7-0081  | wild type                                                                                           | FSL, Cornell    |
| <i>L. seeligeri</i> | LS52     | FSL L5-0018  | wild type                                                                                           | FSL, Cornell    |
| <i>L. seeligeri</i> | LS53     | FSL R2-0626  | wild type                                                                                           | FSL, Cornell    |
| <i>L. seeligeri</i> | LS54     | FSL R8-7055  | wild type                                                                                           | FSL, Cornell    |
| <i>L. seeligeri</i> | LS55     | FSL C7-0498  | wild type                                                                                           | FSL, Cornell    |
| <i>L. seeligeri</i> | LS56     | FSL R9-4405  | wild type                                                                                           | FSL, Cornell    |
| <i>L. seeligeri</i> | LS57     | FSL S10-0788 | wild type                                                                                           | FSL, Cornell    |
| <i>L. seeligeri</i> | LS58     | FSL C7-0167  | wild type                                                                                           | FSL, Cornell    |
| <i>L. seeligeri</i> | LS59     | FSL M6-0259  | wild type                                                                                           | FSL, Cornell    |
| <i>L. seeligeri</i> | LS60     | FSL S10-0889 | wild type                                                                                           | FSL, Cornell    |
| <i>L. seeligeri</i> | LS61     | FSL B8-0378  | wild type                                                                                           | FSL, Cornell    |
| <i>L. seeligeri</i> | LS62     | N/A          | wild type                                                                                           | FSL, Cornell    |
| <i>L. seeligeri</i> | LS1      | N/A          | $\Delta spc \Delta cas13a$                                                                          | (32)            |
| <i>L. seeligeri</i> | LS1      | N/A          | $\Delta RM, \Delta spc$                                                                             | This Study      |
| <i>L. seeligeri</i> | LS1      |              | $94^{\circ}::Ptet-spc4$                                                                             | (11)            |
| <i>L. seeligeri</i> | LS1      |              | $\Delta spc \Delta cas13a, 94^{\circ}::Ptet-spc4$                                                   | (11)            |
| <i>E. coli</i>      | Rosetta2 | N/A          | F- <i>ompT</i><br><i>hsdSB</i> (rB- mB- )<br><i>gal dcm</i> (DE3)<br>pRARE2 (CamR)                  | Millipore-Sigma |
| <i>E. coli</i>      | SM10     |              | <i>thi thr leu tonA</i><br><i>lacY supE</i><br><i>recA::RP4-2-Tc::Mu Km <math>\lambda</math>pir</i> | (30)            |
| <i>E. coli</i>      | b2163    |              | <i>dapA::erm-pir116</i><br><i>RP4-2-Tc::Mu Km</i>                                                   | (33)            |

\*FSL, Food Science Lab

**Table S3. Phages used in this study.**

| <b>Phage</b> | <b>Host</b>         | <b>Genotype</b>         | <b>Origin</b>                                              |
|--------------|---------------------|-------------------------|------------------------------------------------------------|
| φLS3         | <i>L. seeligeri</i> | wild type               | This Study, induced from <i>L. seeligeri</i> LS3           |
| φLS4         | <i>L. seeligeri</i> | wild type               | This Study, induced from <i>L. seeligeri</i> LS4           |
| φLS6         | <i>L. seeligeri</i> | wild type               | This Study, induced from <i>L. seeligeri</i> LS6           |
| φLS10        | <i>L. seeligeri</i> | wild type               | This Study, induced from <i>L. seeligeri</i> LS10          |
| φLS14        | <i>L. seeligeri</i> | wild type               | This Study, induced from <i>L. seeligeri</i> LS14          |
| φLS46        | <i>L. seeligeri</i> | wild type               | This Study, induced from <i>L. seeligeri</i> LS46          |
| φLS48        | <i>L. seeligeri</i> | wild type               | This Study, induced from <i>L. seeligeri</i> LS48          |
| φLS51        | <i>L. seeligeri</i> | wild type               | This Study, induced from <i>L. seeligeri</i> LS51          |
| φLS57        | <i>L. seeligeri</i> | wild type               | This Study, induced from <i>L. seeligeri</i> LS57          |
| φLS59        | <i>L. seeligeri</i> | wild type               | This Study, induced from <i>L. seeligeri</i> LS59          |
| φLS62        | <i>L. seeligeri</i> | wild type               | This Study, induced from <i>L. seeligeri</i> LS62          |
| φEGDe        | <i>L. seeligeri</i> | wild type               | This Study, induced from <i>L. monocytogenes</i> EGDe      |
| φ10403S      | <i>L. seeligeri</i> | wild type               | This Study, induced from <i>L. monocytogenes</i> 10403S    |
| U153         | <i>L. seeligeri</i> | wild type               | (33)                                                       |
| A118         | <i>L. seeligeri</i> | wild type               | (33)                                                       |
| φLS46        | <i>L. seeligeri</i> | $\Delta$ <i>gpl-4</i>   | This Study, escaper of pAM379 targeting                    |
| φLS46        | <i>L. seeligeri</i> | $\Delta$ <i>acrVIA1</i> | This Study, pAM386-recombinant escaper of pAM377 targeting |

**Table S4. Plasmids used in this study.**

| Plasmid | Description                                             | Source                          | Construction Notes                                                                         |
|---------|---------------------------------------------------------|---------------------------------|--------------------------------------------------------------------------------------------|
| pAM8    | <i>E. coli-Listeria</i> shuttle vector (cat)            | Meeske, et al. 2018 Mol Cell    | N/A                                                                                        |
| pAM52   | <i>spc2</i> cat target in pAM8                          | Meeske, et al. 2018 Mol Cell    | N/A                                                                                        |
| pAM54   | <i>spc4</i> cat target in pAM8                          | Meeske, et al. 2018 Mol Cell    | N/A                                                                                        |
| pAM326  | <i>E. coli-Listeria</i> shuttle vector (kan)            | This Study                      | Gibson assembly of kanR (oAM1055/1056), pSK1 ori (oAM1057/1058), oriT (oAM1059/1060)       |
| pPL2e   | <i>Listeria</i> integrating vector (erm)                | Lauer, et al. 2002 J Bacteriol. | N/A                                                                                        |
| pAM215  | <i>lacZ</i> suicide vector (cat)                        | Meeske, et al. 2019 Nature      | N/A                                                                                        |
| pAM305  | Type VI RSR in pPL2e with BsaI sites for spacer cloning | This Study                      | Gibson assembly of BamHI/SalI digested pPL2e and BsaI RSR synthetic fragment (oAM462/451)  |
| pAM375  | <i>pgp1-4</i>                                           | This Study                      | Gibson assembly of HindIII/EagI digested pAM326 and gp1-4 region (oAM1176/1177)            |
| pAM388  | <i>pgp1</i>                                             | This Study                      | Gibson assembly of HindIII/EagI digested pAM326, Ptet (oAM1107/572) and gp1 (oAM1178/1179) |
| pAM383  | <i>pgp2</i>                                             | This Study                      | Gibson assembly of HindIII/EagI digested pAM326, Ptet (oAM1107/572) and gp2 (oAM1180/1181) |
| pAM384  | <i>pgp3</i>                                             | This Study                      | Gibson assembly of HindIII/EagI digested pAM326, Ptet (oAM1107/572) and gp3 (oAM1182/1183) |
| pAM385  | <i>pgp4</i>                                             | This Study                      | Gibson assembly of HindIII/EagI digested pAM326, Ptet (oAM1107/572) and gp4 (oAM1184/1185) |
| pAM449  | <i>spc2</i> in pAM305                                   | This Study                      | Ligation of BsaI-digested pAM305 and annealed oAM464/465                                   |
| pAM450  | <i>spc4</i> in pAM305                                   | This Study                      | Ligation of BsaI-digested pAM305 and annealed oAM770/771                                   |
| pAM422  | <i>spcA1</i> targeting $\phi$ LS46 in pAM305            | This Study                      | Ligation of BsaI-digested pAM305 and annealed oAM1270/1271                                 |
| pAM380  | <i>spcE1</i> targeting $\phi$ LS46 in pAM305            | This Study                      | Ligation of BsaI-digested pAM305 and annealed oAM1192/1193                                 |
| pAM381  | <i>spcE2</i> targeting $\phi$ LS46 in pAM305            | This Study                      | Ligation of BsaI-digested pAM305 and annealed oAM1194/1195                                 |
| pAM382  | <i>spcL1</i> targeting $\phi$ LS46 in pAM305            | This Study                      | Ligation of BsaI-digested pAM305 and annealed oAM1196/1197                                 |
| pAM434  | <i>spcL2</i> targeting $\phi$ LS46 in pAM305            | This Study                      | Ligation of BsaI-digested pAM305 and annealed oAM1370/1371                                 |
| pAM436  | <i>spcL4</i> targeting $\phi$ LS46 in pAM305            | This Study                      | Ligation of BsaI-digested pAM305 and annealed oAM1374/1375                                 |
| pAM437  | <i>spcL5</i> targeting $\phi$ LS46 in pAM305            | This Study                      | Ligation of BsaI-digested pAM305 and annealed oAM1376/1377                                 |
| pAM438  | <i>spcL6</i> targeting $\phi$ LS46 in pAM305            | This Study                      | Ligation of BsaI-digested pAM305 and annealed oAM1378/1379                                 |



|        |                                                                                                      |                            |                                                                                                                                     |
|--------|------------------------------------------------------------------------------------------------------|----------------------------|-------------------------------------------------------------------------------------------------------------------------------------|
| pAM439 | <i>spcL7</i> targeting $\phi$ LS46 in pAM305                                                         | This Study                 | Ligation of BsaI-digested pAM305 and annealed oAM1382/1383                                                                          |
| pAM440 | <i>spcL8</i> targeting $\phi$ LS46 in pAM305                                                         | This Study                 | Ligation of BsaI-digested pAM305 and annealed oAM1384/1385                                                                          |
| pAM442 | Array of 3 <i>spc</i> ( <i>spcA1</i> , <i>spcE1</i> , <i>spcE2</i> ) targeting $\phi$ LS46 in pAM305 | This Study                 | Gibson assembly of BamHI/SalI digested pPL2e and 3 <i>spc</i> synthetic fragment                                                    |
| pAM365 | <i>spc59</i> targeting $\phi$ LS59 in pAM305                                                         | This Study                 | Ligation of BsaI-digested pAM305 and annealed oAM559/560                                                                            |
| pAM386 | repair template for <i>acrVIA1</i> deletion                                                          | This Study                 | Gibson assembly of HindIII/EagI digested pAM326 and $\Delta$ gp2 upstream (oAM1176/1206) and $\Delta$ gp2 downstream (oAM1207/1177) |
| pAM307 | type II CRISPR system ( <i>S. pyogenes</i> ) in pAM8 with SapI sites for spacer cloning              | Meeske, et al. 2019 Nature | N/A                                                                                                                                 |
| pAM377 | Cas9 <i>spc</i> targeting <i>gp4</i> of $\phi$ LS46 in pAM307                                        | This Study                 | Ligation of SapI-digested pAM307 and annealed oAM1186/1187                                                                          |
| pAM379 | Cas9 <i>spc</i> targeting <i>gp2</i> of $\phi$ LS46 in pAM307                                        | This Study                 | Ligation of SapI-digested pAM307 and annealed oAM1190/1191                                                                          |
| pAM364 | CRISPR array + Cas13-His6 in pPL2e                                                                   | This Study                 | Gibson assembly of BamHI/SalI digested pPL2e and CRISPR locus (oAM462/1111)                                                         |
| pAM395 | AcrVIA1-3xFlag in pAM326                                                                             | This Study                 | Gibson assembly of HindIII/EagI digested pAM326 and AcrVIA1-3xflag synthetic fragment                                               |
| pAM414 | <i>pPacr-lacZ</i> in pAM8                                                                            | This Study                 | Gibson assembly of BamHI/EagI digested pAM8, <i>Pacr</i> (oAM1256/1257) and <i>lacZ</i> (oAM304/702)                                |
| pAM417 | CRISPR array + Cas13-His6 in pAM8 (for purification)                                                 | This Study                 | Gibson assembly of BamHI/EagI digested pAM8 and CRISPR locus (oAM631/1260)                                                          |
| pAM419 | CRISPR array + dCas13-His6 in pAM8 (for purification)                                                | This Study                 | Gibson assembly of BamHI/EagI digested pAM8 and CRISPR locus (oAM631/1260, amplified from dCas13 strain)                            |
| pAM452 | AcrVIA1(Y39A, S40A, N43A, S93A, Q96A)-3xFlag in pAM326                                               | This Study                 | Gibson assembly of HindIII/EagI digested pAM326 and mutant Acr allele synthetic fragment                                            |
| pAM453 | AcrVIA1( $\Delta$ E131-E134)-3xFlag in pAM326                                                        | This Study                 | Gibson assembly of HindIII/EagI digested pAM326 and mutant Acr allele synthetic fragment                                            |
| pAM454 | AcrVIA1(I2A, Y4A)-3xFlag in pAM326                                                                   | This Study                 | Gibson assembly of HindIII/EagI digested pAM326 and mutant Acr allele synthetic fragment                                            |
| pAM455 | AcrVIA1(S68A, F69A)-3xFlag in pAM326                                                                 | This Study                 | Gibson assembly of HindIII/EagI digested pAM326 and mutant Acr allele synthetic fragment                                            |
| pAM456 | AcrVIA1( $\Delta$ N173-N232)-3xFlag in pAM326                                                        | This Study                 | Gibson assembly of HindIII/EagI digested pAM326 mutant Acr allele synthetic fragment                                                |

**Table S5. Oligonucleotide primers used in this study.**

| Primer  | Sequence                                                              |
|---------|-----------------------------------------------------------------------|
| oAM224  | GGCGTGAAAATCAACGACCC                                                  |
| oAM225  | TTTGCTTCAATGTCGCCAGC                                                  |
| oAM304  | ATGAATGTGTTATCCTCAATTTGTT                                             |
| oAM451  | GTACCGGGCCCCCTCGAGGTTTTGTGATGCATGATTTGTTCTG                           |
| oAM462  | CGGCCGCTCTAGAAGTAGTGAGTGCCAAGTAACTGTGC                                |
| oAM464  | AAACTTAGTCAACCCCTCGCTGCATTTTCACATT                                    |
| oAM465  | TTACAATGTGAAAATGCAGCGAGGGGTTGACTAA                                    |
| oAM559  | TTACAAAAGAAGCTAAAGAAGTAAAAGAAGAAG                                     |
| oAM560  | AAACCTTCTTCTTTTACTTCTTTAGCTTCTTTTT                                    |
| oAM572  | GTTTAACTCACTCTATCAATGATAGAGAGCTTATTTTAATTAT                           |
| oAM631  | GCAAGACGTAGCCAGCGCGTCAGTGCCAAGTAACTGTGC                               |
| oAM770  | AAACCATATTTCCAAACTCCACTTTGACTACACC                                    |
| oAM702  | GCGACCACACCCGTCCTGTGCTAAACCTTCCCGGCTTC                                |
| oAM771  | TTACGGTGTAGTCAAAGTGGAGTTTGGAAATATG                                    |
| oAM1055 | CCCAGCGAACCATTTGAGG                                                   |
| oAM1056 | TTATGCATCCCTTAACTTAAAAACAATTCATCCAGTAAAATATAATATTTTATTTCTCC           |
| oAM1057 | TACTGGATGAATTGTTTAAAGTTAAGGGATGCATAAACTGCATC                          |
| oAM1058 | ATCCATGGCCTGGATCCATCAAGCTTAAAATTAGTATAATTATAGCACGAGCTCTGAT            |
| oAM1059 | GCTTGATGGATCCAGGCCATGGATGGCGGCCCTCTCGCTGTCCCCTC                       |
| oAM1060 | ACCTCAAATGGTTCGCTGGGTTAATCGCTTGCCCTCATCTGT                            |
| oAM1107 | CTATAATTATACTAATTTTACATCACGGAAAAAGGTTATGC                             |
| oAM1111 | TACCGGGCCCCCTCGAGGTTAATGATGATGGTGGTATGCTTCATCGTTAATAGCGTT<br>CTTACTAG |
| oAM1176 | CGTGCTATAATTATACTAATTTTATATATTCGTTGACTACATTTTTCTACTATAATAGAAG         |
| oAM1177 | TGAGGGGACAGGCGAGAGGCTATTACATTACAGCTAGTGATAAGTATGTACAG                 |
| oAM1178 | CATTGATAGAGTGAGTTAAACACTTTACAAGTTTAAACATATTATGTTAATATATAAATAT<br>AGC  |
| oAM1179 | TGAGGGGACAGGCGAGAGGCGCCATTTATTATTTGTTATATTTGTTGTAATAAATTTAC           |
| oAM1180 | ATTGATAGAGTGAGTTAAACCTATAGGAGGAAAAACGATGATCTAC                        |
| oAM1181 | GAGGGGACAGGCGAGAGGCTTAATTTAGCTCCTCTTTTAAAAATTTGTTTGC                  |
| oAM1182 | CATTGATAGAGTGAGTTAACTAAAAGAGGAGCTAAATTAATGACAAATTTAATC                |
| oAM1183 | GAGGGGACAGGCGAGAGGCATTTATATAAAAAGTTTAAATTTCTGCATTAATTTCTGG            |
| oAM1184 | CATTGATAGAGTGAGTTAACTTTAGGAGGAATTAATGAATAAATTTGCAT                    |
| oAM1185 | TGAGGGGACAGGCGAGAGGCCTGATGTATTATTAATCCTTGCTCTTTTTTATC                 |
| oAM1186 | AAACCAAGGTAAATTTGAAGTACAGATTCAAAAA                                    |
| oAM1187 | AACTTTTTGAATCTGTACTTCAAATTTACCTTGG                                    |
| oAM1190 | AAACTATTCTTTTGATTTCTAAAAATATAGTA                                      |
| oAM1191 | AACTACTATATTTTTAGAAATCAAAAGAAATGAG                                    |

|         |                                                                         |
|---------|-------------------------------------------------------------------------|
| oAM1192 | TTACAACAAATATGGAAAGTAATTTATTTAAATT                                      |
| oAM1193 | AAACAATTTAAATAAATTACTTTCCATATTTGTT                                      |
| oAM1194 | TTACTTTATTTCGATAAAGACAGCACGAATAAAAA                                     |
| oAM1195 | AAACTTTTTATTTCGTGCTGTCTTTATCGAATAAA                                     |
| oAM1196 | TTACCAACTATCGAAATTGATTGGAAAATAAATA                                      |
| oAM1197 | AAACTATTTATTTTCCAATCAATTTTCGATAGTTG                                     |
| oAM1206 | CTCCTCTTTTAAAATTTGTTTGTAGATCATCGTTTTTTCCTCCTATAGTC                      |
| oAM1207 | CGATGATCTACAAACAAATTTTAAAAGAGGAGCTAAATTAATG                             |
| oAM1256 | AAGACGTAGCCCAGCGCGTCTATATTCGTTGACTACATTTTTCTACTATAATAGAAG               |
| oAM1257 | CAAATTGAGGATAACACATTCATCGTTTTTTCCTCCTATAGTCGGTTATC                      |
| oAM1260 | GCGACCACACCCGTCCTGTGTTAATGATGATGGTGGTATGCTTCATCGTTAATAGCGTT<br>CTTACTAG |
| oAM1270 | TTACGATGATTAATGATGACTGAAAAACAAAA                                        |
| oAM1271 | AAACTTTGTTTTTCAGTCATCATTTTAATCATC                                       |
| oAM1370 | TTACTACAAACAACACGTATAAAAACAAAAAATT                                      |
| oAM1371 | AAACAATTTTTGTTTTTATACGTGTTGTTTGTA                                       |
| oAM1374 | TTACTAATAGAAGAGGTTGTAAGATTGTAAG                                         |
| oAM1375 | AAACCTTACAATCTTTTACAACCTCTTCTATTA                                       |
| oAM1376 | TTACTTTATTACAATATATTCCGCAAACATTCAA                                      |
| oAM1377 | AAACTTGAATGTTTGCGGAATATATTGTAATAAA                                      |
| oAM1378 | TTACTTGCAAAAAGAAATTACAAAGGACTTTCATT                                     |
| oAM1379 | AAACAATGAAAGTCCTTTGTAATTTCTTTTGTCAA                                     |
| oAM1382 | TTACGAATCTGGACATTTAATTGATTTTGCAAAA                                      |
| oAM1383 | AAACTTTTGCAAAATCAATTAATGTCCAGATTC                                       |
| oAM1384 | TTACTAAAGCAATAGCGAAATACATTGAAGAAAA                                      |
| oAM1385 | AAACTTTCTTCAATGATTTTCGCTATTGCTTTA                                       |
| oAM1415 | GTTTGCCTAAAAATGCGCTTAAATCAGC                                            |
| oAM1416 | CGTCGTGCAATGCTAATCAAGATTGC                                              |

**Table S6. RNA oligonucleotides used in this study**

| <b>RNA oligo</b> | <b>Sequence</b>                                                  |
|------------------|------------------------------------------------------------------|
| non-target       | GGCACACCCGCAGGGAGGAGCCAAAGCACGUCCAUCAUCCGUUGCCACA<br>GCAGAAGCCC  |
| spc2 target      | GGCACACCCGCAGGGAAAUGUGAAAAUGCAGCGAGGGGUUGACUAACAC<br>AGCAGAAGCCC |

**Table S7. Synthetic gene fragments used in this study.**

| Description                                                | Sequence                                                                                                                                                                                                                                                                                                                                                                                                                                                                                                                                                                                                                                                                                                                                                                                                                                                                                                                                                                                                                                                                                                     |
|------------------------------------------------------------|--------------------------------------------------------------------------------------------------------------------------------------------------------------------------------------------------------------------------------------------------------------------------------------------------------------------------------------------------------------------------------------------------------------------------------------------------------------------------------------------------------------------------------------------------------------------------------------------------------------------------------------------------------------------------------------------------------------------------------------------------------------------------------------------------------------------------------------------------------------------------------------------------------------------------------------------------------------------------------------------------------------------------------------------------------------------------------------------------------------|
| Type VI RSR in with BsaI sites for spacer cloning          | ccgggccccccctcgaggTTTTGTGATGCATGATTTGTTCTGTATTATCTTGCATT<br>TCATTTTCATAAACTAACTTGCCCCGTTTTTATCCCTAGAAATTAGTAC<br>TTTTTTCTATCAACCTCTACTTTAGTAATTCTCATAGTTTTCACCTCAAT<br>GATTTTTTCTCTCTTCTATTGTACATATAATCACAAAAAATAAAACAC<br>CTAAATGATGGATAAGCGTTTTTATACTTATCCAcatTAGACGTTTTAGTC<br>CTCTTCATATAGAGGTAGTCTTACTGAGACCAGTCTCGGAAGCTCA<br>AAGGTCTCAGTTTTAGTCCTCTTTCATATAGAGGTAGTCTTACCCTAC<br>TTAATAATAGTAATTAACAACCAATGTAAAGGATATAATCAATATAT<br>TTAAAGTTTGCACGAGAATGCAATCATTTTATTCATAAATATCATATCAT<br>TTATAAGCTCTATTTCCATTTTCTAAGGCTAATAAATAAAACTGCTGTA<br>CCTATGGATCTAAGGAAGACTTATGCACACAGTACAGCAACTTTTCAGC<br>ATGATTTGTGTTAAAAACATTTAATTTATTGTAGCAATTTCTTGAGAATC<br>TATAAACCATTTTCCGGTTTCAATTTTAAACCACTCCAAATCTAACAATA<br>CTTGATTTTCCGGTTTCTTTTGATTGTGCGACTTGAAAAGCAGACCAGGCT<br>CGCACAGTTACTTGGCACTcactagtctagaGcggcc                                                                                                                                                                                                                                                                                          |
| Array of 3 spc (spcA1, spcE1, spcE2) targeting $\phi$ LS46 | TTTTGTGATGCATGATTTGTTCTGTATTATCTTGCATTTTCATTTTCATAAA<br>CTAACCTTGCCCCGTTTTTATCCCTAGAAATTAGTACTTTTTTCTATCA<br>ACCTCTACTTTAGTAATTCTCATAGTTTTCACCTCAATGATTTTTTCTCT<br>CTTCTATTGTACATATAATCACAAAAAATAAAACACCTAAATGATGGA<br>TAAGCGTTTTTATACTTATCCAcatTAGACGTTTTAGTCCTCTTTCATATAG<br>AGGTAGTCTCTTACGATGATTAATAATGATGACTGAAAAACAAAAGTTTT<br>AGTCCTCTTTCATATAGAGGTAGTCTTACTTTATTTCGATAAAGACAGC<br>ACGAATAAAAAGTTTTAGTCCTCTTTCATATAGAGGTAGTCTTACAA<br>CAAATATGGAAAGTAATTTATTTAAATTGTTTTAGTCCTCTTTCATATAG<br>AGGTAGTCTCTTACCCTACTTAATAATAGTAATTAACAACCAATGTA<br>AAGGATATAATCAATATATTTAAAGTTTGCACGAGAATGCAATCATTTT<br>ATTCATAAATATCATATCATTTATAAGCTCTATTTCCATTTTCTAAGGC<br>TAATAAATAAAACTGCTGTACCTATGGATCTAAGGAAGACTTATGCACA<br>CAGTACAGCAACTTTTCAGCATGATTTGTGTTAAAAACATTTAATTTATT<br>GTAGCAATTTCTTGAGAATCTATAAACCATTTTCCGGTTTCAATTTTAAAC<br>CAACTCCAAATCTAACAATACTTGATTTTCCGGTTTTCTTTTGATTGTCGA<br>CTTGAAAAGCAGACCAGGCTCGCACAGTTACTTGGCACT                                                                                                                                                                             |
| AcrVIA1-3xFlag                                             | ctcgtgctataataactaattttACATCACGGAAAAAGGTTATGCTGCTTTTAAGACC<br>CACTTTCACATTTAAGTTGTTTTTCTAATCCGCATATGATCAATTCAAGG<br>CCGAATAAGAAGGCTGGCTCTGCACCTTGGTGATCAAATAATTTCGATAG<br>CTTGTCGTAATAATGGCGGCATACTATCAGTAGTAGGTGTTCCCTTTCT<br>TCTTTAGCGACTTGATGCTCTTGATCTTCCAATACGCAACCTAAAGTAA<br>AATGCCCCACAGCGCTGAGTGCATATAATGCATTCTCTAGTGA AAAAACC<br>TTGTTGGCATAAAAAGGCTAATTGATTTTTCGAGAGTTTCATACTGTTTTT<br>CTGTAGGCCGTGTACCTAAATGTACTTTTGCTCCATCGCGATGACTTAGT<br>AAAGCACATCTAAAACCTTTAGCGTTATTACGTAAAAAATCTTGCCAGC<br>TTTCCCCTTCTAAAGGGCAAAAAGTGAGTATGGTGCCTATCTAACATCTC<br>AATGGCTAAGGCGTCGAGCAAAGCCCGCTTATTTTTTACATGCCAATAC<br>AATGTAGGCTGCTCTACACCTAGCTTCTGGGCGAGTTTACGGGTTGTTA<br>AACCTTCGATTCCGACCTCATTAAGCAGCTCTAATGCGCTGTTAATCACT<br>TFACTTTTATCTAATCTAGACATCATTAATTCCTCCTTTTTGTTGACATTA<br>TATCATTGATAGAGTTATTTGTCAAAGTATTTTTTATTTGGATCCCCTC<br>GAGTTCATGAAAACTAAAAAATAATTGACACTCTATCATTGATAGAG<br>CATAATTAATAAAGCTCTCTATCATTGATAGAGTGAGTTAAACCTATA<br>GGAGGAAAAACGATGATCTACTATATAAAGATTTAAAGTGAAAGG<br>AAAAATATTTGAAAATCTAATGAACAAAGAGGCTGTAGAAGGATTAAT<br>TACTTTTTTAAAGAAAGCGGAATTTGAGATATACTCAAGAGAAAATTAT |

|                                                                  |                                                                                                                                                                                                                                                                                                                                                                                                                                                                                                                                                                                                                                                                                                                                                                                                                                                                                                                                                                                                                                                                                                                                                                                                                                                                                                                                                                                                                                                                                                                                                                                                                                                                                                                                                                                                                                                                                                                                     |
|------------------------------------------------------------------|-------------------------------------------------------------------------------------------------------------------------------------------------------------------------------------------------------------------------------------------------------------------------------------------------------------------------------------------------------------------------------------------------------------------------------------------------------------------------------------------------------------------------------------------------------------------------------------------------------------------------------------------------------------------------------------------------------------------------------------------------------------------------------------------------------------------------------------------------------------------------------------------------------------------------------------------------------------------------------------------------------------------------------------------------------------------------------------------------------------------------------------------------------------------------------------------------------------------------------------------------------------------------------------------------------------------------------------------------------------------------------------------------------------------------------------------------------------------------------------------------------------------------------------------------------------------------------------------------------------------------------------------------------------------------------------------------------------------------------------------------------------------------------------------------------------------------------------------------------------------------------------------------------------------------------------|
|                                                                  | <p>TCAAATACAACAAATGGTTTGAATGTGGAAAAGCCCAACTTCGAGC<br/> CTTGTGTTTTGGAAAAATTATAGTTTTTCGCTGTCATCTTCTTTTTGTCATA<br/> GAAAAAGATGGTGAATGCCTTGAATTCTGCATCTGTTTTGAATCTG<br/> TACTTCAAATTTACCTTGC GGATCCGTTTCGCTCCCGATACGAAAGAACT<br/> TTTTGTTGAGGTTTGAATTTATATGAATGTTTAGCGGATGTC ACTGTGCG<br/> TAGAACATTTTGAAGCGGAAGAATCAGCGTGGCATAAATTAACCCATA<br/> ATGAGACCGAAGTATCAAAAAGAGTCTATAGTAAAGATGATGACGAAC<br/> TTCTTAAATATATTCCAGAATTTCTTGACACCATAGCGACAAACAAGAA<br/> AAGTCAAAAATACAATCAAATCAAGGAAAAATACAAGAAATTAATAA<br/> GGAAATAGCTACACTTTATGAATCGTCAGAGGATTATATATTTACTGAA<br/> TATGTTAGTAATTTATATAGAGAGTCTGCAAAGTTGGAGCAACACAGCA<br/> AACAAATTTTAAAAGAGGAGCTAAATGACTACAAGGATCATGATGGTG<br/> ATTATAAAGATCACGACATCGATTACAAAGATGATGACGATAAATAAG<br/> Cctctcgctgccccctcagttcagtaatttc</p>                                                                                                                                                                                                                                                                                                                                                                                                                                                                                                                                                                                                                                                                                                                                                                                                                                                                                                                                                                                                                                                                                                                                                        |
| <p>AcrVIA1(Y39A,<br/>S40A, N43A,<br/>S93A, Q96A)-<br/>3xFlag</p> | <p>ctcgtgctataataactaattttACATCACGGAAAAAGGTTATGCTGCTTTTAAGACC<br/> CACTTTCACATTTAAGTTGTTTTTCTAATCCGCATATGATCAATTC AAGG<br/> CCGAATAAGAAGGCTGGCTCTGCACCTTGGTGATCAAATAATTCGATAG<br/> CTTGTCGTAATAATGGCGGCATACTATCAGTAGTAGGTGTTTCCCTTTCT<br/> TCTTTAGCGACTTGATGCTCTTGATCTTCCAATACGCAACCTAAAGTAA<br/> AATGCCCCACAGCGCTGAGTGCATATAATGCATTCTCTAGTGAAAAACC<br/> TTGTTGGCATAAAAAGGCTAATTGATTTTCGAGAGTTTCATACTGTTTTT<br/> CTGTAGGCCGTGTACCTAAATGTACTTTTGCTCCATCGCGATGACTTAGT<br/> AAAGCACATCTAAAACTTTTAGCGTTATTACGTAAAAAATCTTGCCAGC<br/> TTTCCCCTTCTAAAGGGCAAAAGTGAGTATGGTGCCTATCTAACATCTC<br/> AATGGCTAAGGCGTCGAGCAAAGCCCCTTATTTTTTACATGCCAATAC<br/> AATGTAGGCTGCTCTACACCTAGCTTCTGGGCGAGTTTACGGGTTGTTA<br/> AACCTTCGATTCCGACCTCATTAAAGCAGCTCTAATGCGCTGTTAATCACT<br/> TTACTTTTATCTAATCTAGACATCATTAAATTCCTCCTTTTTGTTGACATTA<br/> TATCATTGATAGAGTTATTTGTCAAACCTAGTTTTTTATTTGGATCCCCTC<br/> GAGTTCATGAAAACTAAAAAATATTGACACTCTATCATTGATAGAG<br/> CATAATTAATAAAGCTCTCTATCATTGATAGAGTGAGTTAAACCTATA<br/> GGAGGAAAAACGATGATCTACTATATAAAGATTTAAAAGTGAAAGG<br/> AAAAATATTTGAAAATCTAATGAACAAAGAGGCTGTAGAAGGATTAAT<br/> TACTTTTTAAAGAAAGCGGAATTTGAGATAGCCGCAAGAGAAGCATAT<br/> TCAAATACAACAAATGGTTTGAATGTGGAAAAGCCCAACTTCGAGC<br/> CTTGTGTTTTGGAAAAATTATAGTTTTTCGCTGTCATCTTCTTTTTGTCATA<br/> GAAAAAGATGGTGAATGCCTTGAATTCTGCATCTGTTTTGAAGCTG<br/> TACTTGCTATTTACCTTGC GGATCCGTTTCGCTCCCGATACGAAAGAACTT<br/> TTTGTTGAGGTTTGAATTTATATGAATGTTTAGCGGATGTC ACTGTGCGT<br/> AGAACATTTTGAAGCGGAAGAATCAGCGTGGCATAAATTAACCCATAA<br/> TGAGACCGAAGTATCAAAAAGAGTCTATAGTAAAGATGATGACGAAC<br/> TCTTAAATATATTCCAGAATTTCTTGACACCATAGCGACAAACAAGAAA<br/> AGTCAAAAATACAATCAAATTC AAGGAAAAATACAAGAAATTAATAAG<br/> GAAATAGCTACACTTTATGAATCGTCAGAGGATTATATATTTACTGAAT<br/> ATGTTAGTAATTTATATAGAGAGTCTGCAAAGTTGGAGCAACACAGCAA<br/> ACAAATTTTAAAAGAGGAGCTAAATGACTACAAGGATCATGATGGTGA<br/> TTATAAAGATCACGACATCGATTACAAAGATGATGACGATAAATAAGC<br/> tctcgctgccccctcagttcagtaatttc</p> |
| <p>AcrVIA1(ΔE131-<br/>E134)-3xFlag</p>                           | <p>ctcgtgctataataactaattttACATCACGGAAAAAGGTTATGCTGCTTTTAAGACC<br/> CACTTTCACATTTAAGTTGTTTTTCTAATCCGCATATGATCAATTC AAGG<br/> CCGAATAAGAAGGCTGGCTCTGCACCTTGGTGATCAAATAATTCGATAG<br/> CTTGTCGTAATAATGGCGGCATACTATCAGTAGTAGGTGTTTCCCTTTCT<br/> TCTTTAGCGACTTGATGCTCTTGATCTTCCAATACGCAACCTAAAGTAA<br/> AATGCCCCACAGCGCTGAGTGCATATAATGCATTCTCTAGTGAAAAACC<br/> TTGTTGGCATAAAAAGGCTAATTGATTTTCGAGAGTTTCATACTGTTTTT<br/> CTGTAGGCCGTGTACCTAAATGTACTTTTGCTCCATCGCGATGACTTAGT</p>                                                                                                                                                                                                                                                                                                                                                                                                                                                                                                                                                                                                                                                                                                                                                                                                                                                                                                                                                                                                                                                                                                                                                                                                                                                                                                                                                                                                                                                             |

|                                      |                                                                                                                                                                                                                                                                                                                                                                                                                                                                                                                                                                                                                                                                                                                                                                                                                                                                                                                                                                                                                                                                                                                                                                                                                                                                                                                                                                                                                                                                                                                                                                                                                                                                                                                                 |
|--------------------------------------|---------------------------------------------------------------------------------------------------------------------------------------------------------------------------------------------------------------------------------------------------------------------------------------------------------------------------------------------------------------------------------------------------------------------------------------------------------------------------------------------------------------------------------------------------------------------------------------------------------------------------------------------------------------------------------------------------------------------------------------------------------------------------------------------------------------------------------------------------------------------------------------------------------------------------------------------------------------------------------------------------------------------------------------------------------------------------------------------------------------------------------------------------------------------------------------------------------------------------------------------------------------------------------------------------------------------------------------------------------------------------------------------------------------------------------------------------------------------------------------------------------------------------------------------------------------------------------------------------------------------------------------------------------------------------------------------------------------------------------|
|                                      | <p>AAAGCACATCTAAAACTTTTAGCGTTATTACGTAAAAAATCTTGCCAGC<br/> TTTTCCCTTCTAAAGGGCAAAGTGAGTATGGTGCCTATCTAACATCTC<br/> AATGGCTAAGGCGTCGAGCAAAGCCCGCTATTTTTTACATGCCAATAC<br/> AATGTAGGCTGCTCTACACCTAGCTTCTGGGCGAGTTTACGGGTTGTTA<br/> AACCTTCGATTCCGACCTCATTAAAGCAGCTCTAATGCGCTGTTAATCACT<br/> TTACTTTTATCTAATCTAGACATCATTAAATTCCTCCTTTTTGTTGACATTA<br/> TATCATTGATAGAGTTATTTGTCAAACCTAGTTTTTTATTTGGATCCCCTC<br/> GAGTTCATGAAAACTAAAAAATATTGACACTCTATCATTGATAGAG<br/> CATAATTAATAAAGCTCTCTATCATTGATAGAGTGAGTTAAACCTATA<br/> GGAGGAAAAACGATGATCTACTATATAAAAGATTTAAAAGTGAAAGG<br/> AAAAATATTTGAAAATCTAATGAACAAAGAGGCTGTAGAAGGATTAAT<br/> TACTTTTTTAAAGAAAGCGGAATTTGAGATATACTCAAGAGAAAATTAT<br/> TCAAATACAACAAATGGTTTTGAAATGTGGAAAAGCCCAACTTCGAGC<br/> CTTGTTGTTTTGGAAAAATTATAGTTTTTCGCTGTCATCTTCTTTTTGTCATA<br/> GAAAAAGATGGTGAATGCCTTGGAATTCCTGCATCTGTTTTTGAATCTG<br/> TACTTCAAATTTACCTTGCGGATCCGTTTCGCTCCCGATACGAAAGA<br/> TTTTGTTGAGGTTTGTAAATTTATATGAATGTTTAGCGGATGTCACTGTG<br/> TAGAACATTTTTCAGCGTGGCATAAATTAACCCATAATGAGACCGAAGT<br/> ATCAAAAAGAGTCTATAGTAAAGATGATGACGAACCTCTTAAATATATT<br/> CCAGAATTTCTTGACACCATAGCGACAAACAAGAAAAGTCAAAAATAC<br/> AATCAAATTCAGGAAAAATACAAGAAATTAATAAGGAAATAGCTACA<br/> CTTTATGAATCGTCAGAGGATTATATATTTACTGAATATGTTAGTAATTT<br/> ATATAGAGAGTCTGCAAAGTTGGAGCAACACAGCAAACAAATTTTAAA<br/> AGAGGAGCTAAATGACTACAAGGATCATGATGGTGATTATAAAGATCA<br/> CGACATCGATTACAAAGATGATGACGATAAATAAGCctctcgcctgccctcagtt<br/> cagtaattc</p>                                                                                                                                                                                                                                                                               |
| <p>AcrVIA1(I2A,<br/> Y4A)-3xFlag</p> | <p>ctcgtgctataataactaactatTTTACATCACGGAAAAAGGTTATGCTGCTTTTTAAGACC<br/> CACTTTCACATTTAAGTTGTTTTTCTAATCCGCATATGATCAATTCAAGG<br/> CCGAATAAGAAGGCTGGCTCTGCACCTTGGTGATCAAATAATTTCGATAG<br/> CTTGTCGTAATAATGGCGGCATACTATCAGTAGTAGGTGTTTCCCTTCT<br/> TCTTTAGCGACTTGATGCTCTTGATCTTCCAATACGCAACCTAAAGTAA<br/> AATGCCCCACAGCGCTGAGTGCATATAATGCATTCTCTAGTGAAAAACC<br/> TTGTTGGCATAAAAAGGCTAATTGATTTTCGAGAGTTTCATACTGTTTTT<br/> CTGTAGGCCGTGTACCTAAATGTACTTTTGTCTCCATCGCGATGACTTAGT<br/> AAAGCACATCTAAAACTTTTAGCGTTATTACGTAAAAAATCTTGCCAGC<br/> TTTTCCCTTCTAAAGGGCAAAGTGAGTATGGTGCCTATCTAACATCTC<br/> AATGGCTAAGGCGTCGAGCAAAGCCCGCTATTTTTTACATGCCAATAC<br/> AATGTAGGCTGCTCTACACCTAGCTTCTGGGCGAGTTTACGGGTTGTTA<br/> AACCTTCGATTCCGACCTCATTAAAGCAGCTCTAATGCGCTGTTAATCACT<br/> TTACTTTTATCTAATCTAGACATCATTAAATTCCTCCTTTTTGTTGACATTA<br/> TATCATTGATAGAGTTATTTGTCAAACCTAGTTTTTTATTTGGATCCCCTC<br/> GAGTTCATGAAAACTAAAAAATATTGACACTCTATCATTGATAGAG<br/> CATAATTAATAAAGCTCTCTATCATTGATAGAGTGAGTTAAACCTATA<br/> GGAGGAAAAACGATGGCTACGCTATAAAAGATTTAAAAGTGAAAGG<br/> AAAAATATTTGAAAATCTAATGAACAAAGAGGCTGTAGAAGGATTAAT<br/> TACTTTTTTAAAGAAAGCGGAATTTGAGATATACTCAAGAGAAAATTAT<br/> TCAAATACAACAAATGGTTTTGAAATGTGGAAAAGCCCAACTTCGAGC<br/> CTTGTTGTTTTGGAAAAATTATAGTTTTTCGCTGTCATCTTCTTTTTGTCATA<br/> GAAAAAGATGGTGAATGCCTTGGAATTCCTGCATCTGTTTTTGAATCTG<br/> TACTTCAAATTTACCTTGCGGATCCGTTTCGCTCCCGATACGAAAGA<br/> TTTTGTTGAGGTTTGTAAATTTATATGAATGTTTAGCGGATGTCACTGTG<br/> TAGAACATTTTGAAGCGGAAGAATCAGCGTGGCATAAATTAACCCATA<br/> ATGAGACCGAAGTATCAAAAAGAGTCTATAGTAAAGATGATGACGAAC<br/> TTCTTAAATATATCCAGAATTTCTTGACACCATAGCGACAAACAAGAA<br/> AAGTCAAAAATACAATCAAATTCAGGAAAAATACAAGAAATTAATAA<br/> GGAAATAGCTACACTTTATGAATCGTCAGAGGATTATATATTTACTGAA</p> |

|                                |                                                                                                                                                                                                                                                                                                                                                                                                                                                                                                                                                                                                                                                                                                                                                                                                                                                                                                                                                                                                                                                                                                                                                                                                                                                                                                                                                                                                                                                                                                                                                                                                                                                                                                                                                                                                                                                               |
|--------------------------------|---------------------------------------------------------------------------------------------------------------------------------------------------------------------------------------------------------------------------------------------------------------------------------------------------------------------------------------------------------------------------------------------------------------------------------------------------------------------------------------------------------------------------------------------------------------------------------------------------------------------------------------------------------------------------------------------------------------------------------------------------------------------------------------------------------------------------------------------------------------------------------------------------------------------------------------------------------------------------------------------------------------------------------------------------------------------------------------------------------------------------------------------------------------------------------------------------------------------------------------------------------------------------------------------------------------------------------------------------------------------------------------------------------------------------------------------------------------------------------------------------------------------------------------------------------------------------------------------------------------------------------------------------------------------------------------------------------------------------------------------------------------------------------------------------------------------------------------------------------------|
|                                | TATGTTAGTAATTTATATAGAGAGTCTGCAAAGTTGGAGCAACACAGCA<br>AACAAATTTTAAAAGAGGAGCTAAATGACTACAAGGATCATGATGGTG<br>ATTATAAAGATCACGACATCGATTACAAAGATGATGACGATAAATAAG<br>Cctctcgctgtcccctcagttcagtaatttc                                                                                                                                                                                                                                                                                                                                                                                                                                                                                                                                                                                                                                                                                                                                                                                                                                                                                                                                                                                                                                                                                                                                                                                                                                                                                                                                                                                                                                                                                                                                                                                                                                                                  |
| AcrVIA1(S68A,<br>F69A)-3xFlag  | ctcgtgtataattataactaattttACATCACGGAAAAAGGTTATGCTGCTTTTAAGACC<br>CACTTTCACATTTAAGTTGTTTTTCTAATCCGCATATGATCAATTCAAGG<br>CCGAATAAGAAGGCTGGCTCTGCACCTTGGTGATCAAATAATTTCGATAG<br>CTTGTCGTAATAATGGCGGCATACTATCAGTAGTAGGTGTTTCCCTTCT<br>TCTTTAGCGACTTGATGCTCTTGATCTTCCAATACGCAACCTAAAGTAA<br>AATGCCCCACAGCGCTGAGTGCATATAATGCATTCTCTAGTGAAAAACC<br>TTGTTGGCATAAAAAGGCTAATTGATTTTCGAGAGTTTCATACTGTTTTT<br>CTGTAGGCCGTGTACCTAAATGTACTTTTGCTCCATCGCGATGACTTAGT<br>AAAGCACATCTAAAACTTTTAGCGTTATTACGTAAAAAATCTTGCCAGC<br>TTTCCCCTTCTAAAGGGCAAAAAGTGAGTATGGTGCCTATCTAACATCTC<br>AATGGCTAAGGCGTCGAGCAAAGCCCCTTATTTTTTACATGCCAATAC<br>AATGTAGGCTGCTCTACACCTAGCTTCTGGGCGAGTTTACGGGTTGTTA<br>AACCTTCGATTCCGACCTCATTAAGCAGCTCTAATGCGCTGTTAATCACT<br>TTACTTTTATCTAATCTAGACATCATTAAATTCCTCCTTTTTGTTGACATTA<br>TATCATTGATAGAGTTATTTGTCAAAGTACTAGTTTTTTATTTGGATCCCCTC<br>GAGTTCATGAAAAACTAAAAAAAATATTGACACTCTATCATTGATAGAG<br>CATAATTAATAAAGCTCTCTATCATTGATAGAGTGAGTTAAACCTATA<br>GGAGGAAAAAACGATGATCTACTATATAAAAGATTTAAAAGTGAAAGG<br>AAAAATATTTGAAAATCTAATGAACAAAGAGGCTGTAGAAGGATTAAT<br>TACTTTTTTAAAGAAAGCGGAATTTGAGATATACTCAAGAGAAAATTAT<br>TCAAATAACAACAAATGGTTTTGAAATGTGGAAAAGCCCAACTTCGAGC<br>CTTGTTTTTGGAAAAATTACGCTGCTCGCTGTCATCTTCTTTTTGTCAT<br>AGAAAAAGATGGTGAATGCCTTGAATTCCTGCATCTGTTTTTGAATCT<br>GTACTTCAAATTTACCTTGCGGATCCGTTGCTCCCGATACGAAAGAAC<br>TTTTTGTGAGGTTTGAATTTATATGAATGTTTAGCGGATGTCACTGTC<br>GTAGAACATTTTGAAGCGGAAGAATCAGCGTGGCATAAATTAACCCAT<br>AATGAGACCGAAGTATCAAAAAGAGTCTATAGTAAAGATGATGACGAA<br>CTTCTTAAATATATCCAGAATTTCTTGACACCATAGCGACAAACAAGA<br>AAAGTCAAAAATACAATCAAATTCAGGAAAAATACAAGAAATTAATA<br>AGGAAATAGCTACACTTTATGAATCGTCAGAGGATTATATTTACTGA<br>ATATGTTAGTAATTTATATAGAGAGTCTGCAAAGTTGGAGCAACACAGC<br>AAACAAATTTTAAAAGAGGAGCTAAATGACTACAAGGATCATGATGGT<br>GATTATAAAGATCACGACATCGATTACAAAGATGATGACGATAAATAA<br>GCctctcgctgtcccctcagttcagtaatttc |
| AcrVIA1(ΔN173-<br>N232)-3xFlag | ctcgtgtataattataactaattttACATCACGGAAAAAGGTTATGCTGCTTTTAAGACC<br>CACTTTCACATTTAAGTTGTTTTTCTAATCCGCATATGATCAATTCAAGG<br>CCGAATAAGAAGGCTGGCTCTGCACCTTGGTGATCAAATAATTTCGATAG<br>CTTGTCGTAATAATGGCGGCATACTATCAGTAGTAGGTGTTTCCCTTCT<br>TCTTTAGCGACTTGATGCTCTTGATCTTCCAATACGCAACCTAAAGTAA<br>AATGCCCCACAGCGCTGAGTGCATATAATGCATTCTCTAGTGAAAAACC<br>TTGTTGGCATAAAAAGGCTAATTGATTTTCGAGAGTTTCATACTGTTTTT<br>CTGTAGGCCGTGTACCTAAATGTACTTTTGCTCCATCGCGATGACTTAGT<br>AAAGCACATCTAAAACTTTTAGCGTTATTACGTAAAAAATCTTGCCAGC<br>TTTCCCCTTCTAAAGGGCAAAAAGTGAGTATGGTGCCTATCTAACATCTC<br>AATGGCTAAGGCGTCGAGCAAAGCCCCTTATTTTTTACATGCCAATAC<br>AATGTAGGCTGCTCTACACCTAGCTTCTGGGCGAGTTTACGGGTTGTTA<br>AACCTTCGATTCCGACCTCATTAAGCAGCTCTAATGCGCTGTTAATCACT<br>TTACTTTTATCTAATCTAGACATCATTAAATTCCTCCTTTTTGTTGACATTA<br>TATCATTGATAGAGTTATTTGTCAAAGTACTAGTTTTTTATTTGGATCCCCTC<br>GAGTTCATGAAAAACTAAAAAAAATATTGACACTCTATCATTGATAGAG<br>CATAATTAATAAAGCTCTCTATCATTGATAGAGTGAGTTAAACCTATA<br>GGAGGAAAAAACGATGATCTACTATATAAAAGATTTAAAAGTGAAAGG                                                                                                                                                                                                                                                                                                                                                                                                                                                                                                                                                                                                                                                                                                                                                                                                                                                   |



AAAAATATTTGAAAATCTAATGAACAAAGAGGCTGTAGAAGGATTAAT  
TACTTTTTTAAAGAAAGCGGAATTTGAGATATACTCAAGAGAAAATTAT  
TCAAATACAACAAATGGTTTTGAAATGTGGAAAAGCCCAACTTCGAGC  
CTTGTTTTGGAAAAATTATAGTTTTTCGCTGTCATCTTCTTTTTGTCATA  
GAAAAGATGGTGAATGCCTTGGAATTCCTGCATCTGTTTTGAATCTG  
TACTCAAATTTACCTTGC GGATCCGTTTCGCTCCCGATACGAAAGAACT  
TTTTGTTGAGGTTTGTAATTTATATGAATGTTTAGCGGATGTCACTGTCG  
TAGAACATTTTGAAGCGGAAGAATCAGCGTGGCATAAATTAACCCATA  
ATGAGACCGAAGTATCAAAAAGAGTCTATAGTAAAGATGATGACGAAC  
TTCTTAAATATATCCAGAATTTCTTGACACCATAGCGACAGACTACAA  
GGATCATGATGGTGATTATAAAGATCACGACATCGATTACAAAGATGAT  
GACGATAAATAAGCctctcgctgtcccctcagttcagtaatttc
